# Supplementary material for: Mollicellins O–R, Four New Depsidones Isolated from the Endophytic Fungus Chaetomium sp. Eef-10
Source: PubMed Central journal article supplement (PMC6321418; doi:10.3390/molecules23123218), 2018-12-05
Supplement: molecules-23-03218-s001.pdf [file molecules-23-03218-s001.pdf]

Supporting Information

# Mollicellins O-R, Four New Depsidones Isolated from the Endophytic Fungus *Chaetomium* sp. Eef-10

Jinkui Ouyang <sup>1,†</sup>, Ziling Mao <sup>1,2,†</sup>, Hui Guo <sup>3</sup>, Yunying Xie <sup>4</sup>, Zehua Cui <sup>5</sup>, Jian Sun <sup>5</sup>, Huixiong Wu <sup>1</sup>, Xiujun Wen <sup>1</sup>, Jun Wang <sup>1,2,\*</sup> and Tijiang Shan <sup>1,2,\*</sup>

<sup>1</sup> Guangdong Key Laboratory for Innovative Development and Utilization of Forest Plant Germplasm, College of Forestry and Landscape Architecture, South China Agricultural University, Guangzhou 510642, China; ouyangjinkui@stu.scau.edu.cn (J.O.); zlmao@scau.edu.cn (Z.M.); hxwu@scau.edu.cn (H.W.); wenxiujun@scau.edu.cn (X.W.)

<sup>2</sup> Guangdong Province Key Laboratory of Microbial Signals and Disease Control, South China Agricultural University, Guangzhou 510642, China

<sup>3</sup> College of Pharmaceutical Sciences, Zhejiang University of Technology, Hangzhou 310014, China; tggh635@163.com

<sup>4</sup> Institute of Medicinal Biotechnology, Chinese Academy of Medical Sciences & Peking Union Medical College, Beijing 100050, China; xieyy@imb.pumc.edu.cn

<sup>5</sup> National Risk Assessment Laboratory for Antimicrobial Resistance of Animal Original Bacteria, South China Agricultural University, Guangzhou 510642, China; cuizehua@stu.scau.edu.cn (Z.C.); jiansun@scau.edu.cn (J.S.)

\* Correspondence: wangjun@scau.edu.cn (J.W.); tjshan@scau.edu.cn (T.S.); Tel.: +86-136-5084-6155 (J.W.); +86-158-2025-8367 (T.S.)

† These authors contributed equally to this work.

Received: 15 November 2018; Accepted: 4 December 2018; Published: 5 December 2018

## Contents

|                                                                                                                       |    |
|-----------------------------------------------------------------------------------------------------------------------|----|
| <b>Figure S1.1</b> UV spectrum of mollicellin O (1).....                                                              | 4  |
| <b>Figure S1.2</b> IR spectrum of mollicellin O (1).....                                                              | 4  |
| <b>Figure S1.3</b> <sup>1</sup> H NMR spectrum of mollicellin O (1) (Acetone- <i>d</i> <sub>6</sub> , 600MHz) .....   | 5  |
| <b>Figure S1.4</b> <sup>13</sup> C NMR spectrum of mollicellin O (1) (Acetone- <i>d</i> <sub>6</sub> , 150 MHz) ..... | 5  |
| <b>Figure S1.5</b> HSQC spectrum of mollicellin O (1) (Acetone- <i>d</i> <sub>6</sub> ).....                          | 6  |
| <b>Figure S1.6</b> HMBC spectrum of mollicellin O (1) (Acetone- <i>d</i> <sub>6</sub> ).....                          | 6  |
| <b>Figure S1.7</b> NOESY spectrum of mollicellin O (1) (Acetone- <i>d</i> <sub>6</sub> ).....                         | 7  |
| <b>Figure S1.8</b> HR-ESI-MS spectrum of mollicellin O (1) .....                                                      | 7  |
| <b>Figure S2.1</b> UV spectrum of mollicellin P (2).....                                                              | 8  |
| <b>Figure S2.2</b> IR spectrum of mollicellin P (2).....                                                              | 9  |
| <b>Figure S2.3</b> <sup>1</sup> H NMR spectrum of mollicellin P (2) (Acetone- <i>d</i> <sub>6</sub> , 600MHz) .....   | 9  |
| <b>Figure S2.4</b> <sup>13</sup> C NMR spectrum of mollicellin P (2) (Acetone- <i>d</i> <sub>6</sub> , 150 MHz) ..... | 10 |
| <b>Figure S2.5</b> HSQC spectrum of mollicellin P (2) (Acetone- <i>d</i> <sub>6</sub> ).....                          | 10 |
| <b>Figure S2.6</b> HMBC spectrum of mollicellin P (2) (Acetone- <i>d</i> <sub>6</sub> ) .....                         | 11 |
| <b>Figure S2.7</b> NOESY spectrum of mollicellin P (2) (Acetone- <i>d</i> <sub>6</sub> ).....                         | 11 |
| <b>Figure S2.8</b> HR-ESI-MS spectrum of mollicellin P (2) .....                                                      | 12 |
| <b>Figure S3.1</b> UV spectrum of mollicellin Q (3).....                                                              | 13 |
| <b>Figure S3.2</b> IR spectrum of mollicellin Q (3) .....                                                             | 13 |
| <b>Figure S3.3</b> <sup>1</sup> H NMR spectrum of mollicellin Q (3) (Acetone- <i>d</i> <sub>6</sub> , 600MHz) .....   | 14 |
| <b>Figure S3.4</b> <sup>13</sup> C NMR spectrum of mollicellin Q (3) (Acetone- <i>d</i> <sub>6</sub> , 150 MHz) ..... | 14 |
| <b>Figure S3.5</b> HSQC spectrum of mollicellin Q (3) (Acetone- <i>d</i> <sub>6</sub> ).....                          | 15 |
| <b>Figure S3.6</b> HMBC spectrum of mollicellin Q (3) (Acetone- <i>d</i> <sub>6</sub> ).....                          | 15 |
| <b>Figure S3.7</b> NOESY spectrum of mollicellin Q (3) (Acetone- <i>d</i> <sub>6</sub> ).....                         | 16 |
| <b>Figure S3.8</b> HR-ESI-MS spectrum of mollicellin Q (3) .....                                                      | 16 |
| <b>Figure S4.1</b> UV spectrum of mollicellin R (4).....                                                              | 17 |
| <b>Figure S4.2</b> IR spectrum of mollicellin R (4).....                                                              | 18 |
| <b>Figure S4.3</b> <sup>1</sup> H NMR spectrum of mollicellin R (4) (Acetone- <i>d</i> <sub>6</sub> , 600MHz) .....   | 18 |

|                                                                                                      |    |
|------------------------------------------------------------------------------------------------------|----|
| <b>Figure S4.4</b> $^{13}\text{C}$ NMR spectrum of mollicellin R (4) (Acetone- $d_6$ , 150 MHz)..... | 19 |
| <b>Figure S4.5</b> HSQC spectrum of mollicellin R (4) (Acetone- $d_6$ ) .....                        | 19 |
| <b>Figure S4.6</b> HMBC spectrum of mollicellin R (4) (Acetone- $d_6$ ) .....                        | 20 |
| <b>Figure S4.7</b> NOESY spectrum of mollicellin R (4) (Acetone- $d_6$ ).....                        | 20 |
| <b>Figure S4.8</b> HR-ESI-MS spectrum of mollicellin R (4).....                                      | 21 |
| <b>Figure S5.1</b> UV spectrum of mollicellin G (5) .....                                            | 22 |
| <b>Figure S5.2</b> IR spectrum of mollicellin G (5).....                                             | 22 |
| <b>Figure S5.3</b> $^1\text{H}$ NMR spectrum of mollicellin G (5) (Acetone- $d_6$ , 600MHz).....     | 23 |
| <b>Figure S5.4</b> $^{13}\text{C}$ NMR spectrum of mollicellin G (5) (Acetone- $d_6$ , 600MHz).....  | 23 |
| <b>Figure S5.5</b> HR-ESI-MS spectrum of mollicellin G (5).....                                      | 24 |
| <b>Figure S6.1</b> UV spectrum of mollicellin H (6) .....                                            | 24 |
| <b>Figure S6.2</b> IR spectrum of mollicellin H (6).....                                             | 25 |
| <b>Figure S6.3</b> $^1\text{H}$ NMR spectrum of mollicellin H (6) (DMSO- $d_6$ , 600MHz) .....       | 25 |
| <b>Figure S6.4</b> $^{13}\text{C}$ NMR spectrum of mollicellin H (6) (DMSO- $d_6$ , 150 MHz) .....   | 26 |
| <b>Figure S6.5</b> HSQC spectrum of mollicellin H (6) (DMSO- $d_6$ ) .....                           | 26 |
| <b>Figure S6.6</b> HMBC spectrum of mollicellin H (6) (DMSO- $d_6$ ) .....                           | 27 |
| <b>Figure S6.7</b> NOESY spectrum of mollicellin H (6) (DMSO- $d_6$ ).....                           | 27 |
| <b>Figure S6.8</b> HR-ESI-MS spectrum of mollicellin H (6) .....                                     | 28 |
| <b>Figure S7.1</b> $^1\text{H}$ NMR spectrum of mollicellin I (7) (Acetone- $d_6$ , 600MHz).....     | 28 |
| <b>Figure S7.2</b> $^{13}\text{C}$ NMR spectrum of mollicellin I (7) (Acetone- $d_6$ , 600MHz).....  | 29 |
| <b>Figure S7.3</b> HR-ESI-MS spectrum of mollicellin I (7).....                                      | 29 |

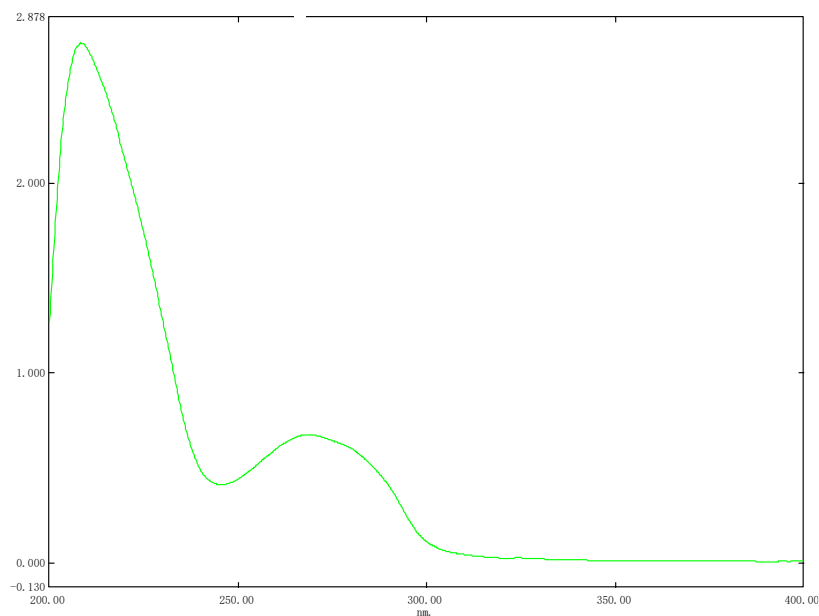

Figure S1.1 UV spectrum of mollicellin O (1)

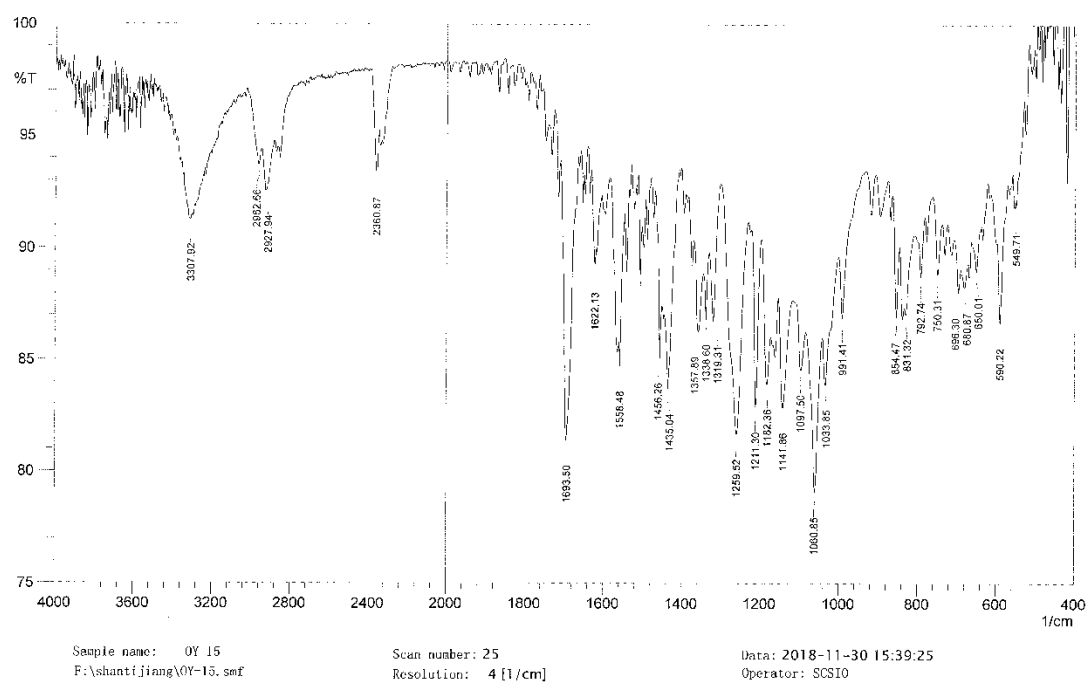

Figure S1.2 IR spectrum of mollicellin O (1)

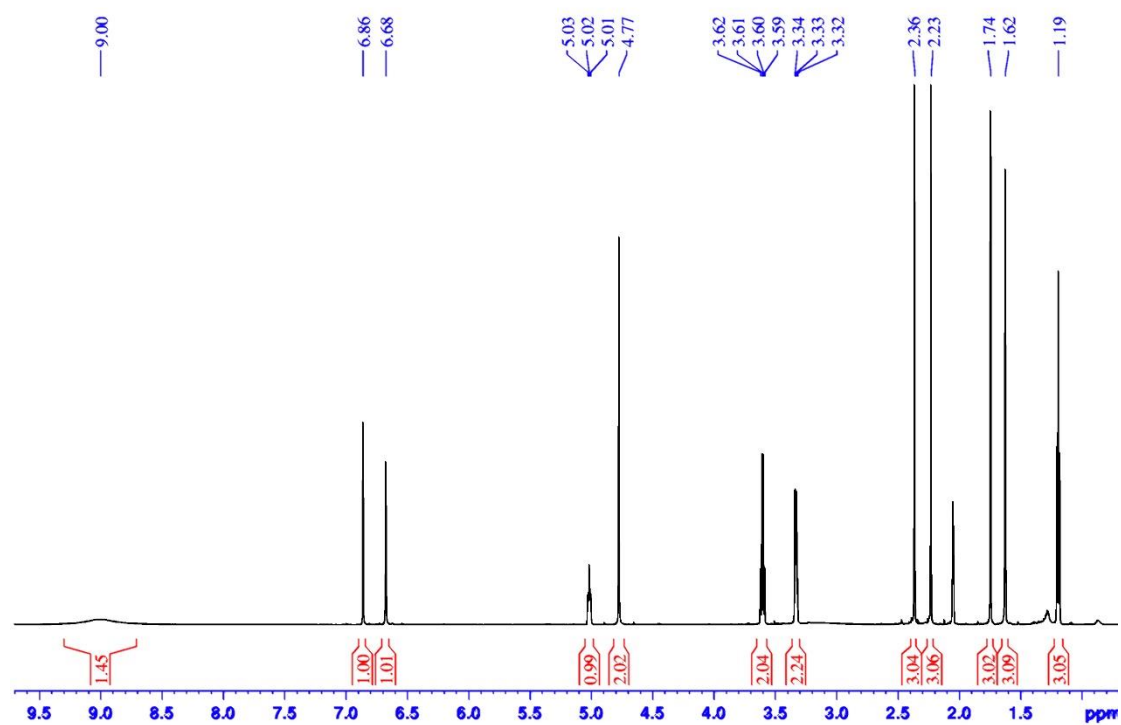

Figure S1.3 <sup>1</sup>H NMR spectrum of mollicellin O (1) (Acetone-*d*<sub>6</sub>, 600MHz)

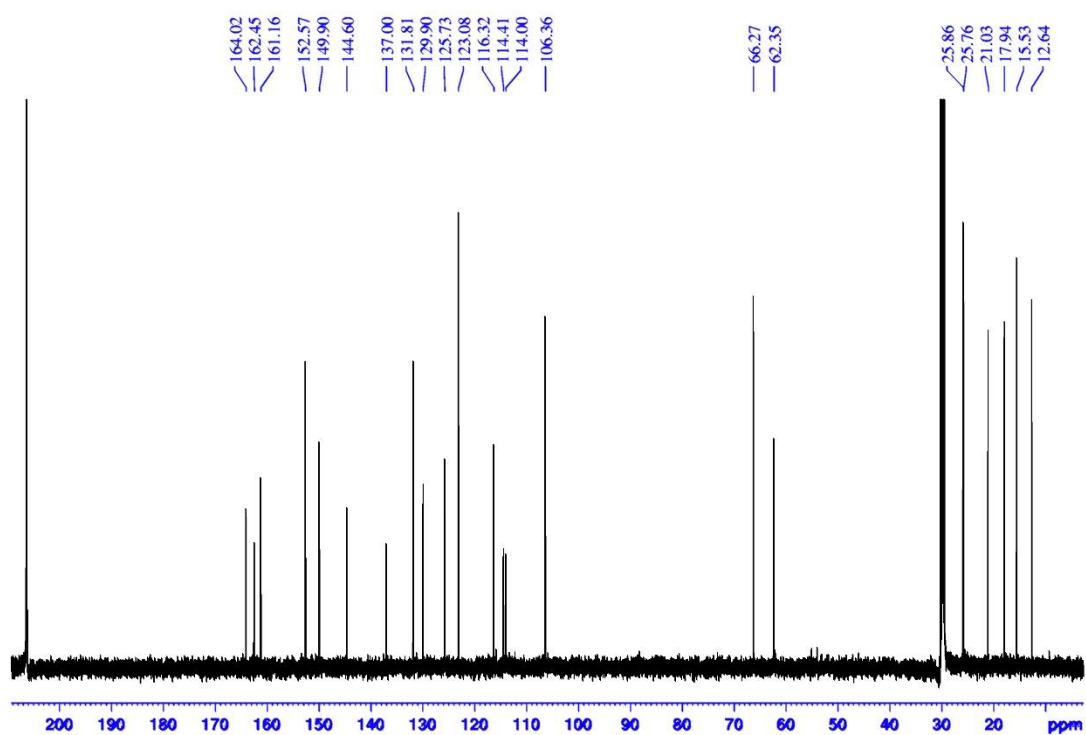

Figure S1.4 <sup>13</sup>C NMR spectrum of mollicellin O (1) (Acetone-*d*<sub>6</sub>, 150 MHz)

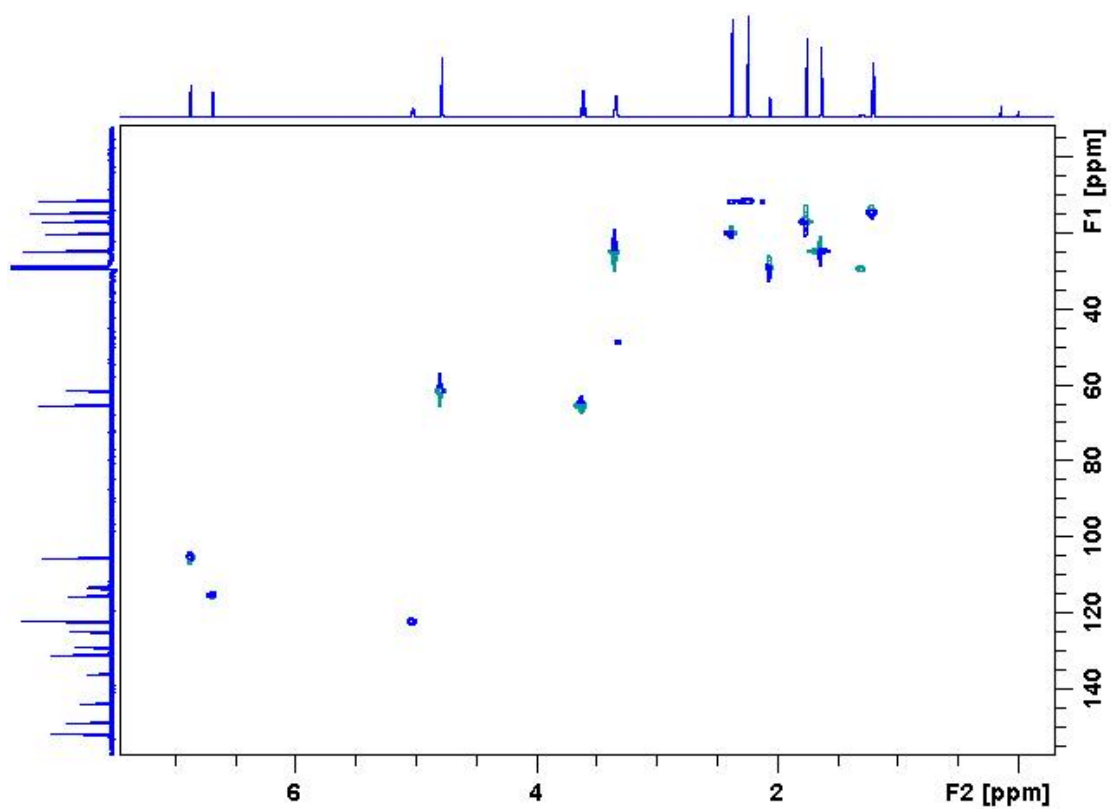

Figure S1.5 HSQC spectrum of mollicellin O (1) (Acetone- $d_6$ )

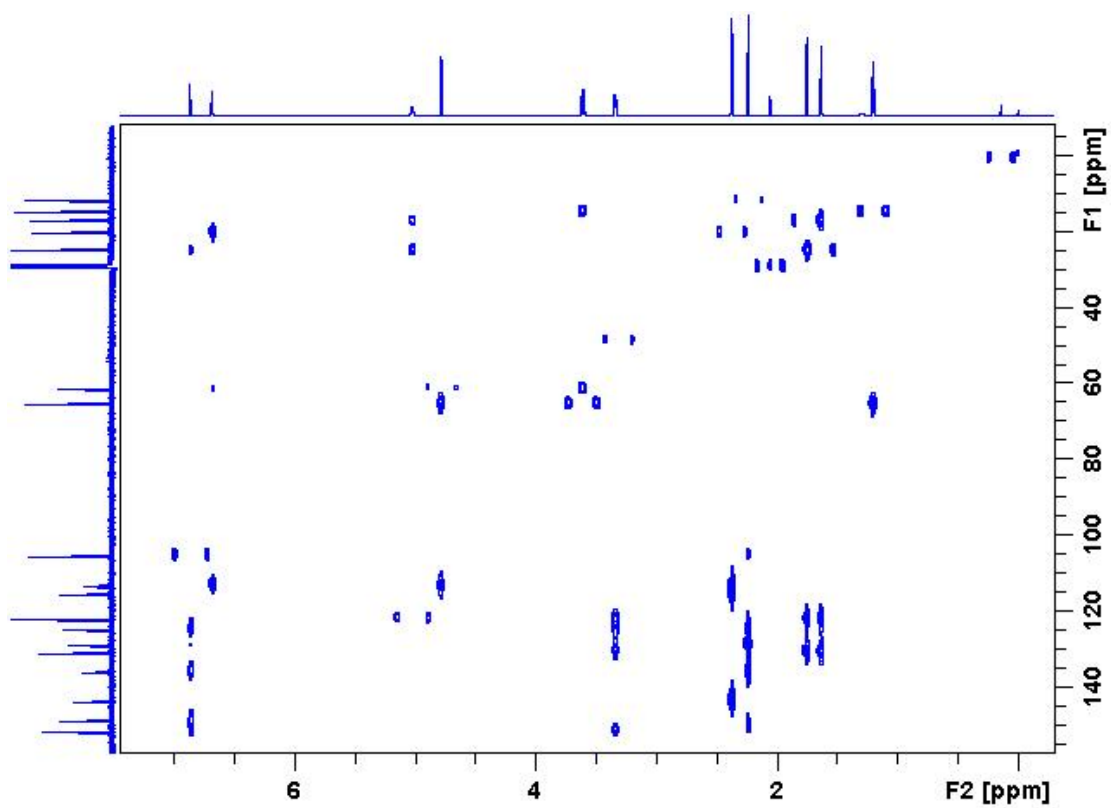

Figure S1.6 HMBC spectrum of mollicellin O (1) (Acetone- $d_6$ )

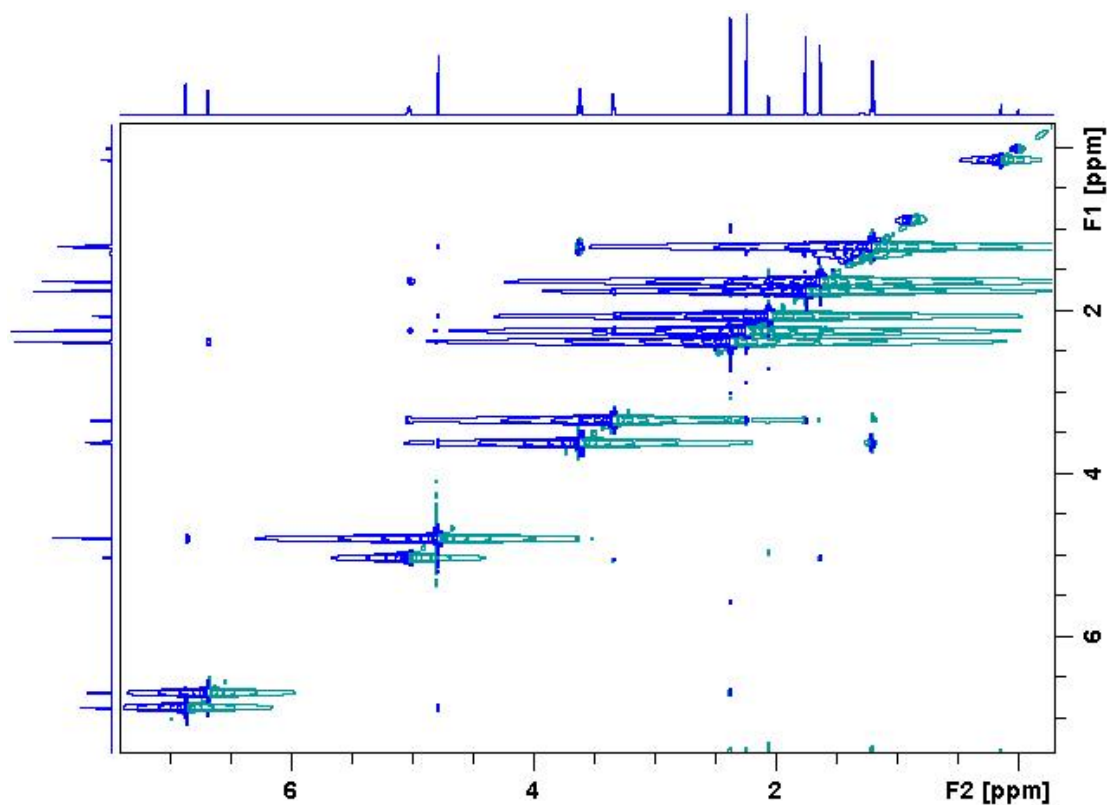

Figure S1.7 NOESY spectrum of mollicellin O (1) (Acetone- $d_6$ )

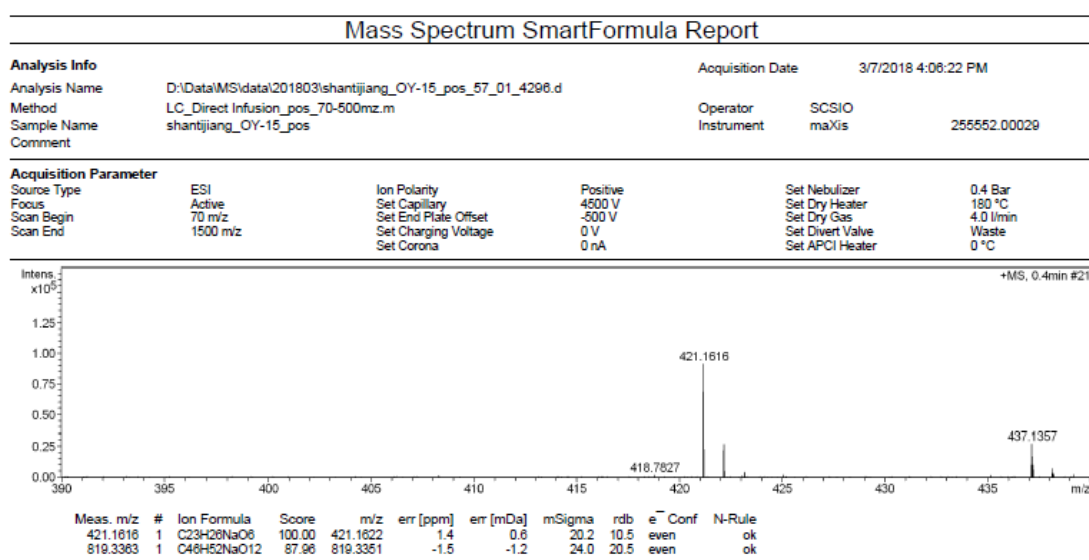

Figure S1.8 HR-ESI-MS spectrum of mollicellin O (1)

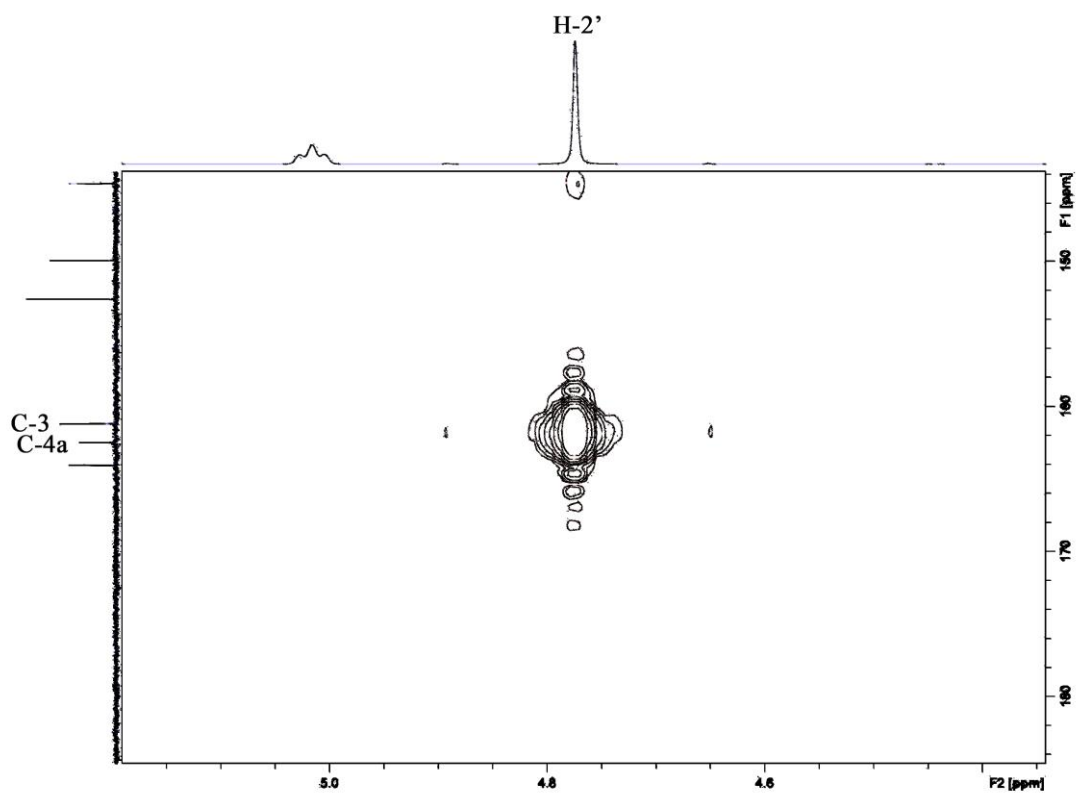

Figure S1.9 HMBC correlation of H-2' with C-4a and C-3 in mollicellin O (1)

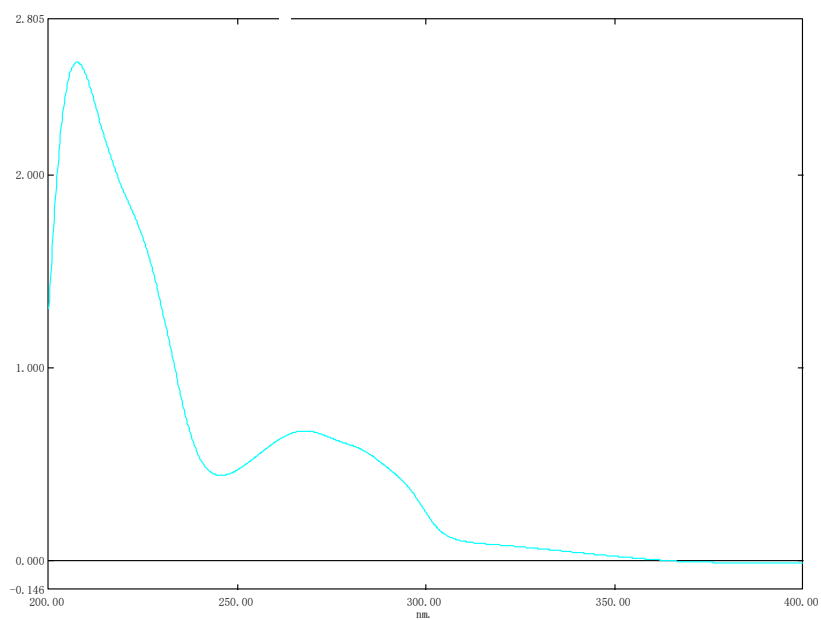

Figure S2.1 UV spectrum of mollicellin P (2)



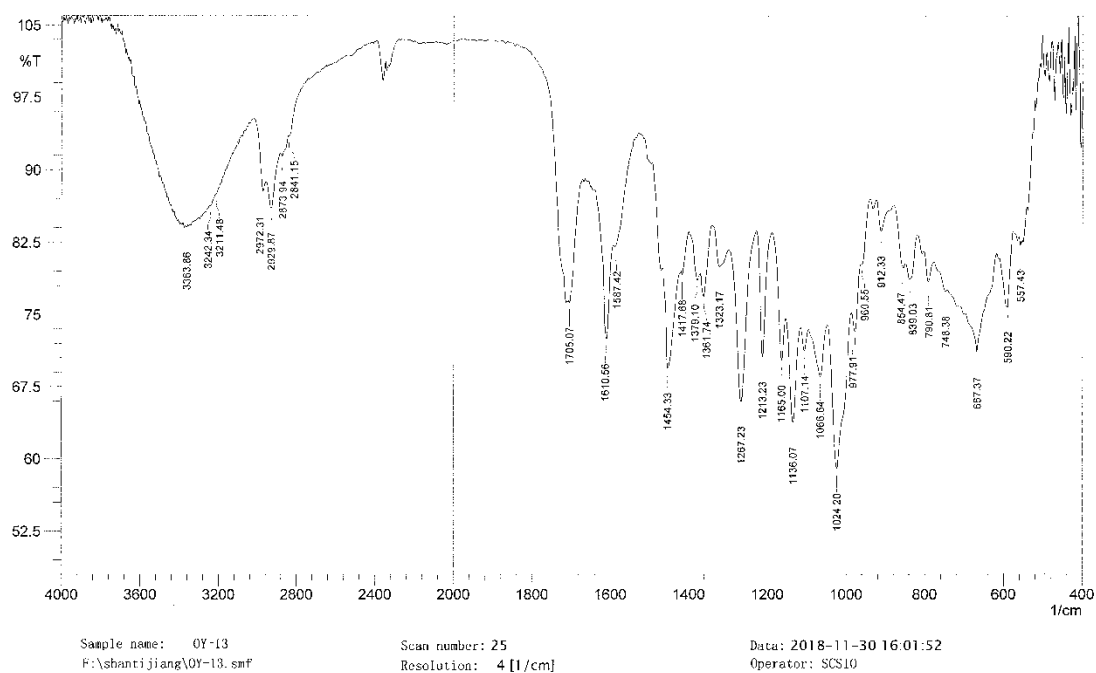

Figure S2.2 IR spectrum of mollicellin P (2)

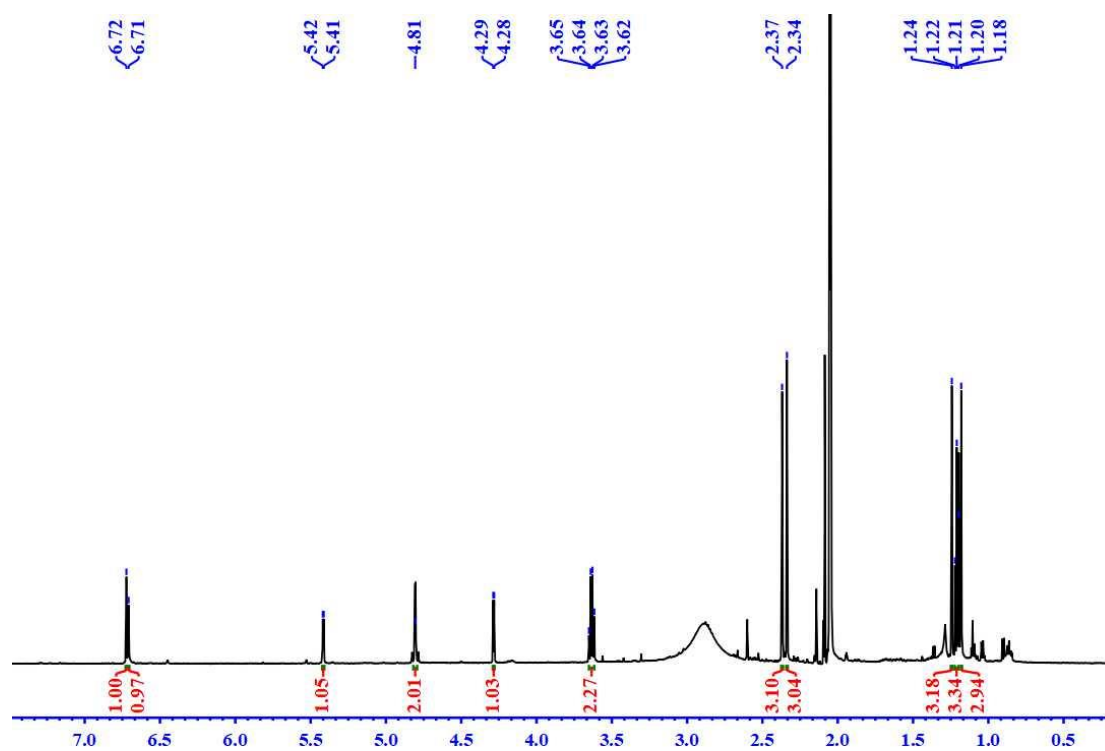Figure S2.3  $^1\text{H}$  NMR spectrum of mollicellin P (2) (Acetone- $d_6$ , 600MHz)

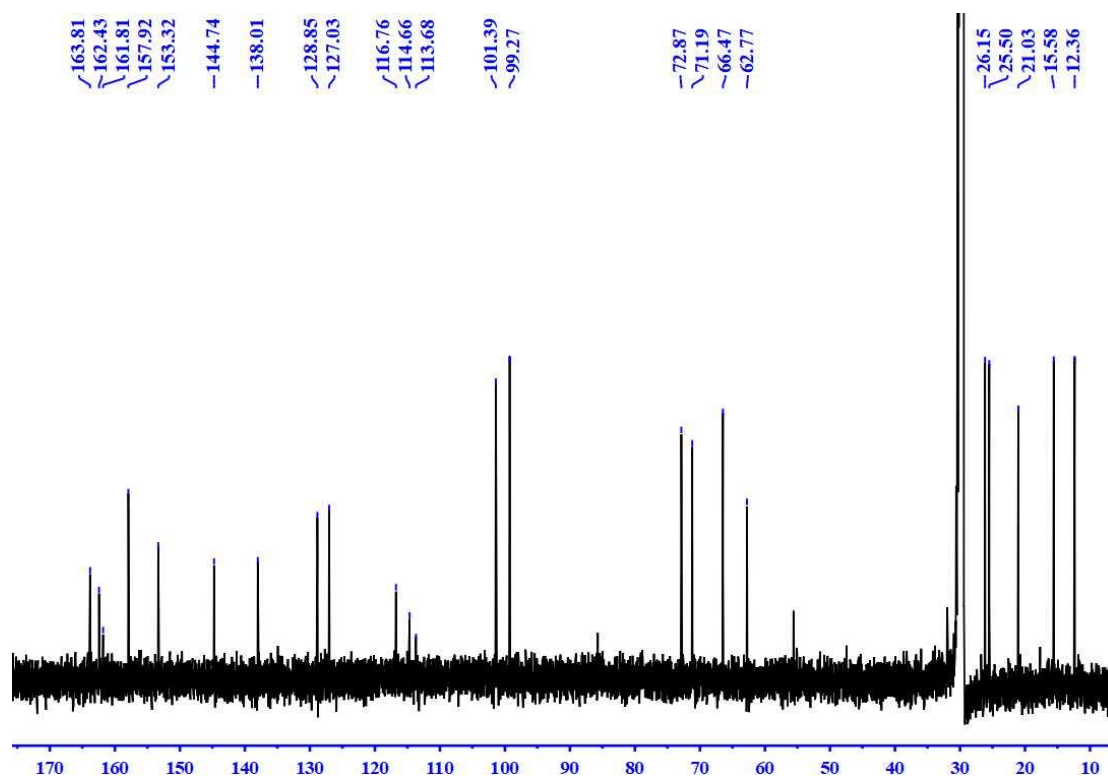

Figure S2.4  $^{13}\text{C}$  NMR spectrum of mollicellin P (2) (Acetone- $d_6$ , 150 MHz)

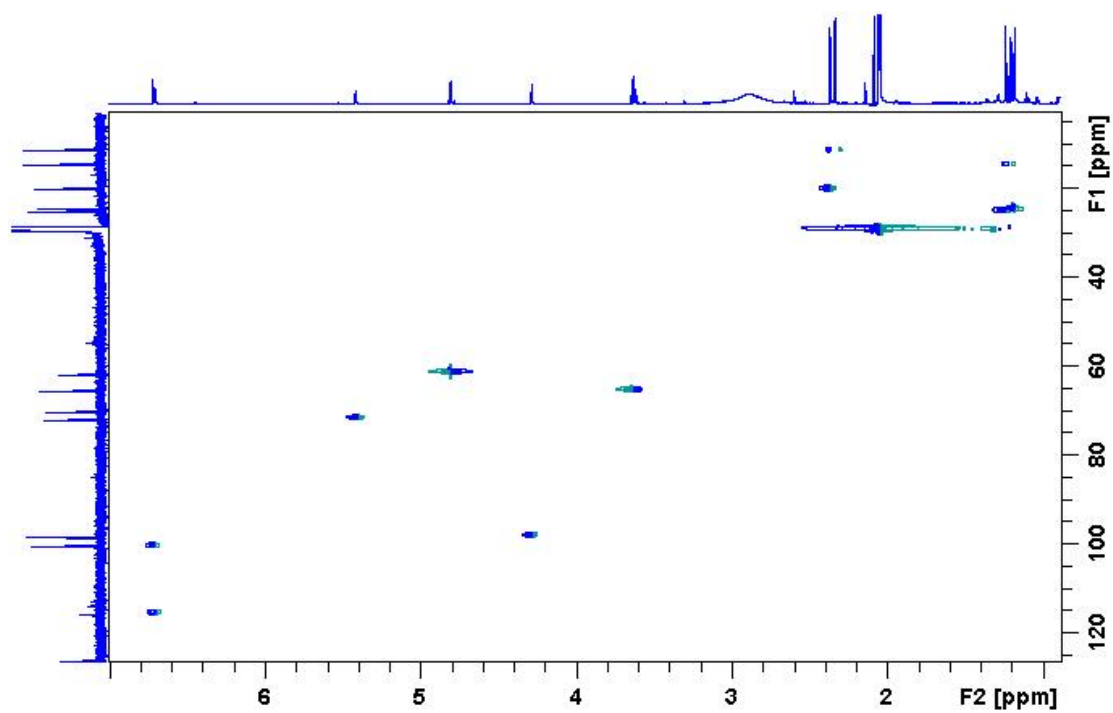

Figure S2.5 HSQC spectrum of mollicellin P (2) (Acetone- $d_6$ )

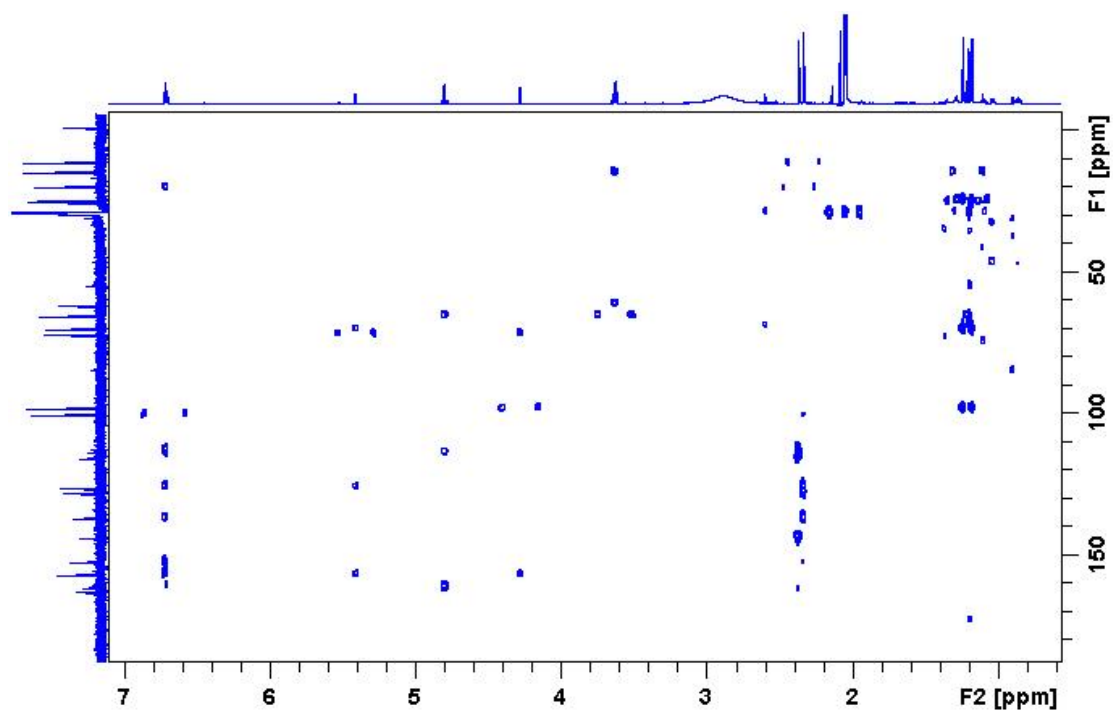

Figure S2.6 HMBC spectrum of mollicellin P (2) (Acetone-*d*<sub>6</sub>)

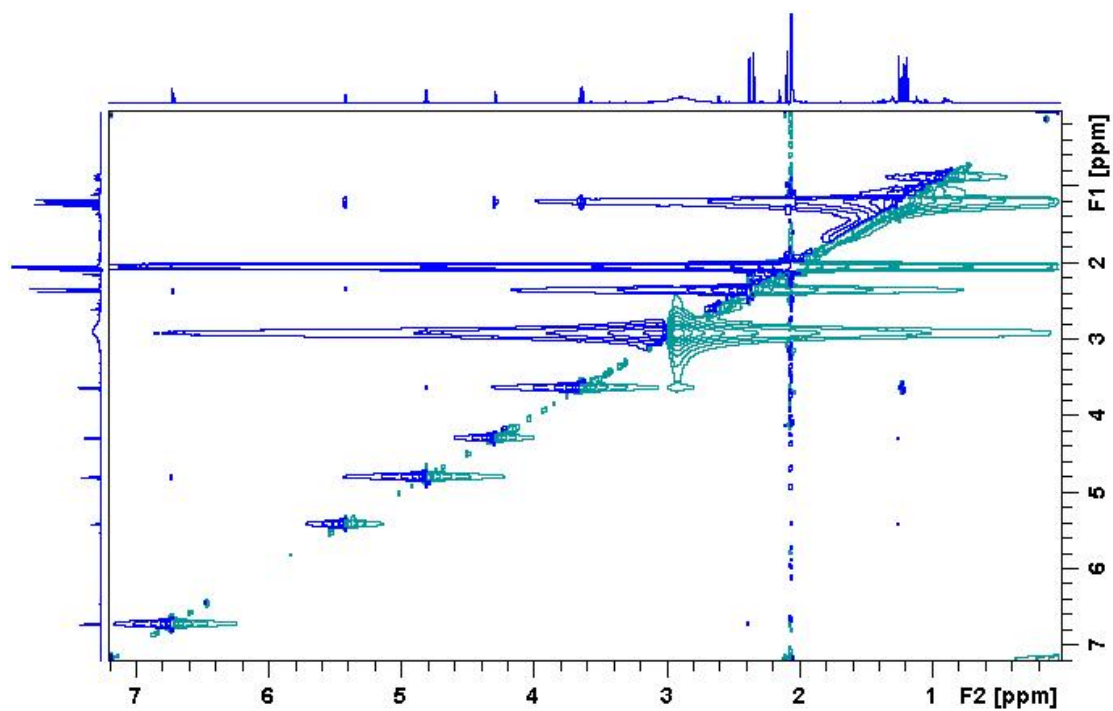

Figure S2.7 NOESY spectrum of mollicellin P (2) (Acetone-*d*<sub>6</sub>)

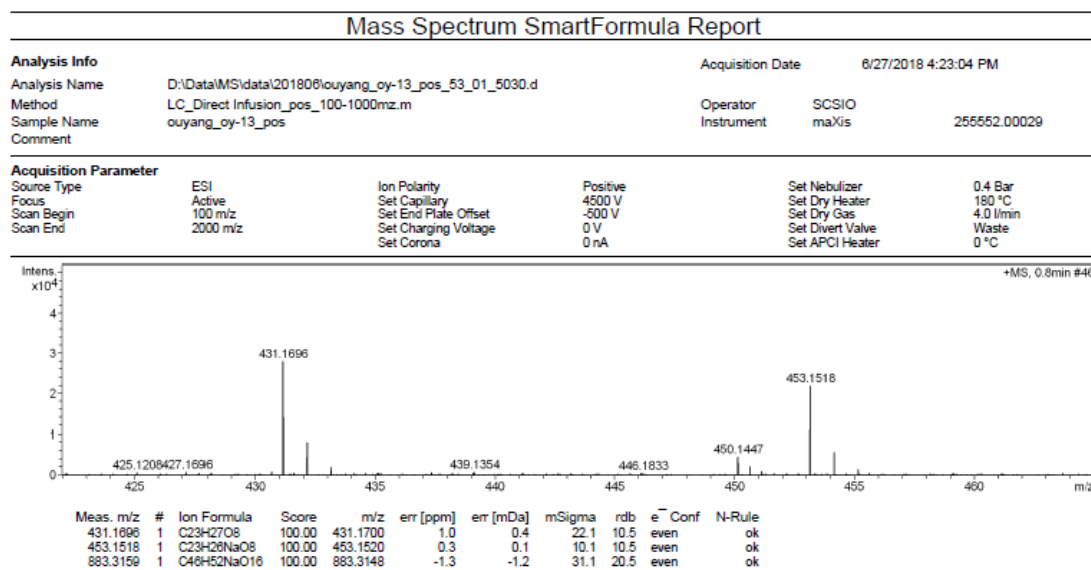

Figure S2.8 HR-ESI-MS spectrum of mollicellin P (2)

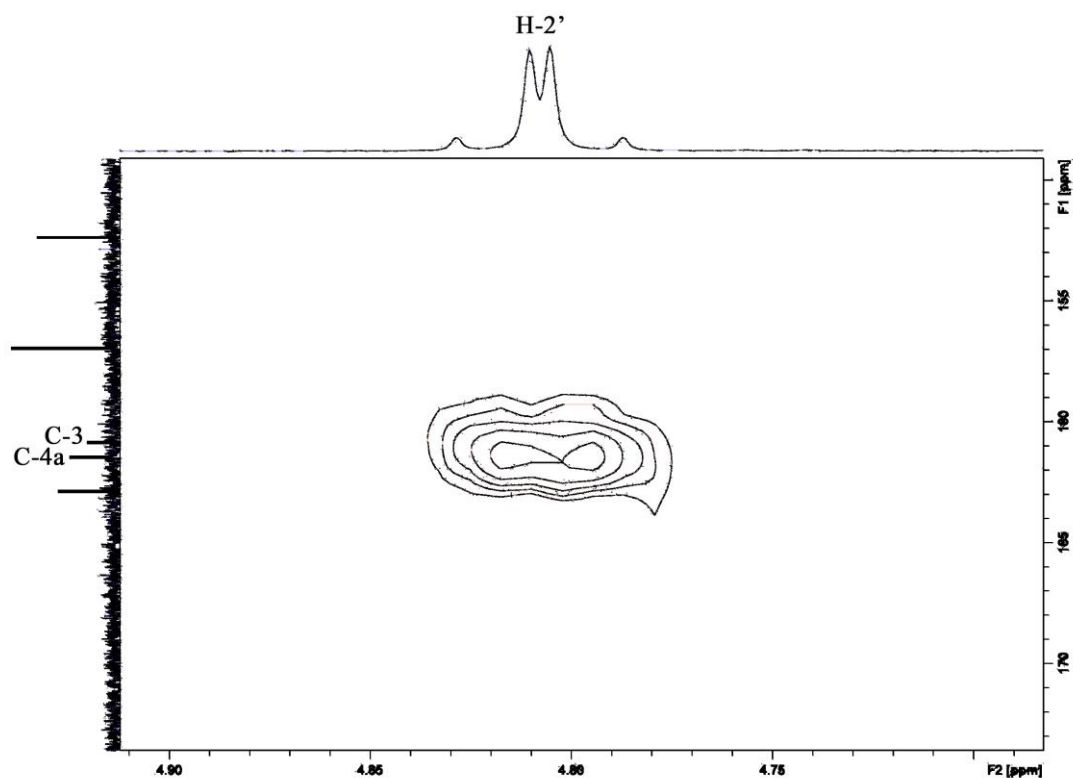

Figure S2.9 HMBC correlation of H-2' with C-4a and C-3 in mollicellin P (2)

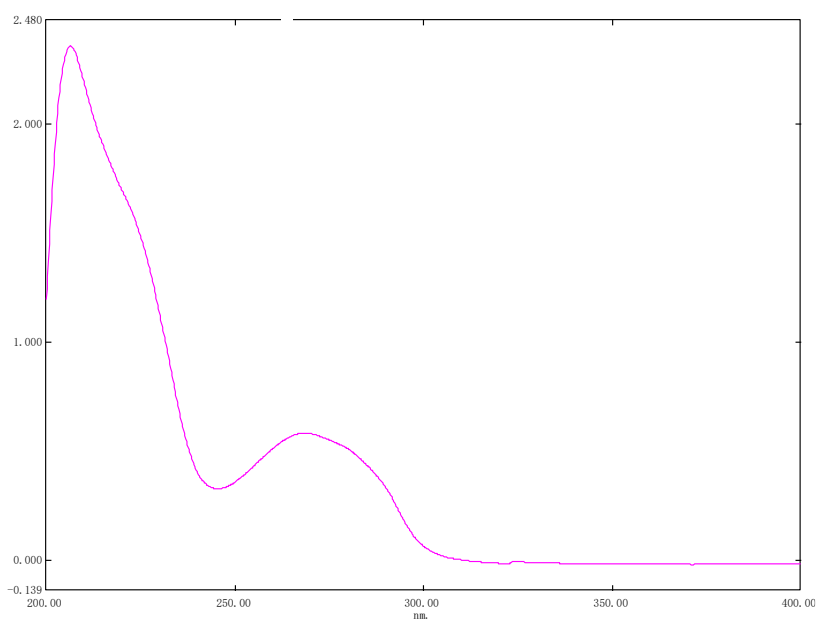

Figure S3.1 UV spectrum of mollicellin Q (3)

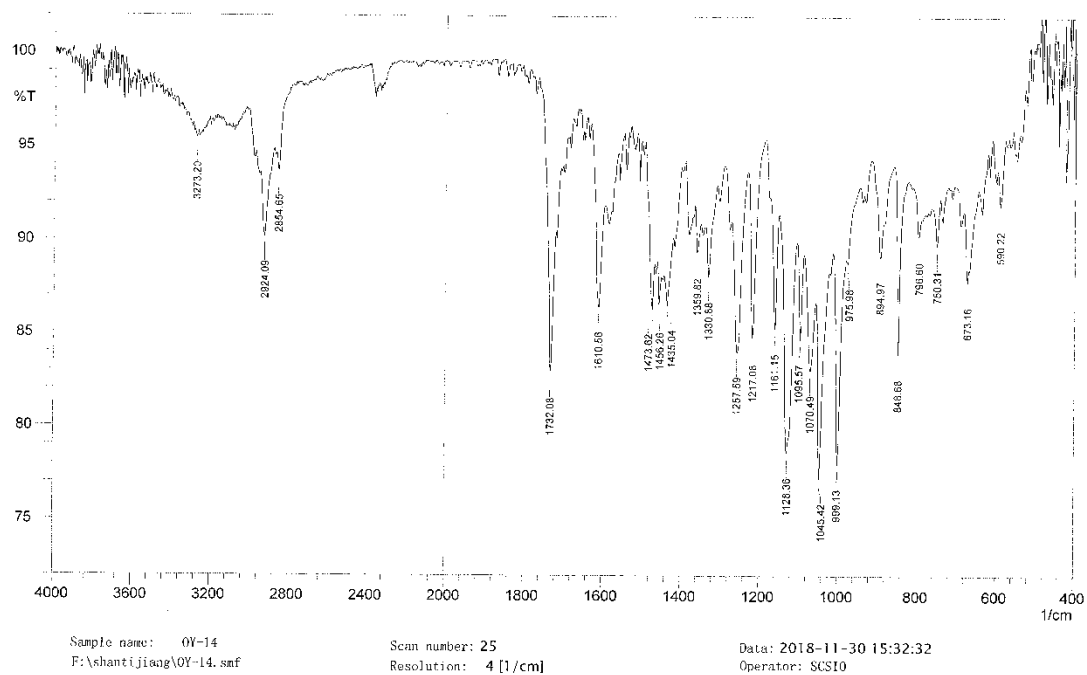

Figure S3.2 IR spectrum of mollicellin Q (3)

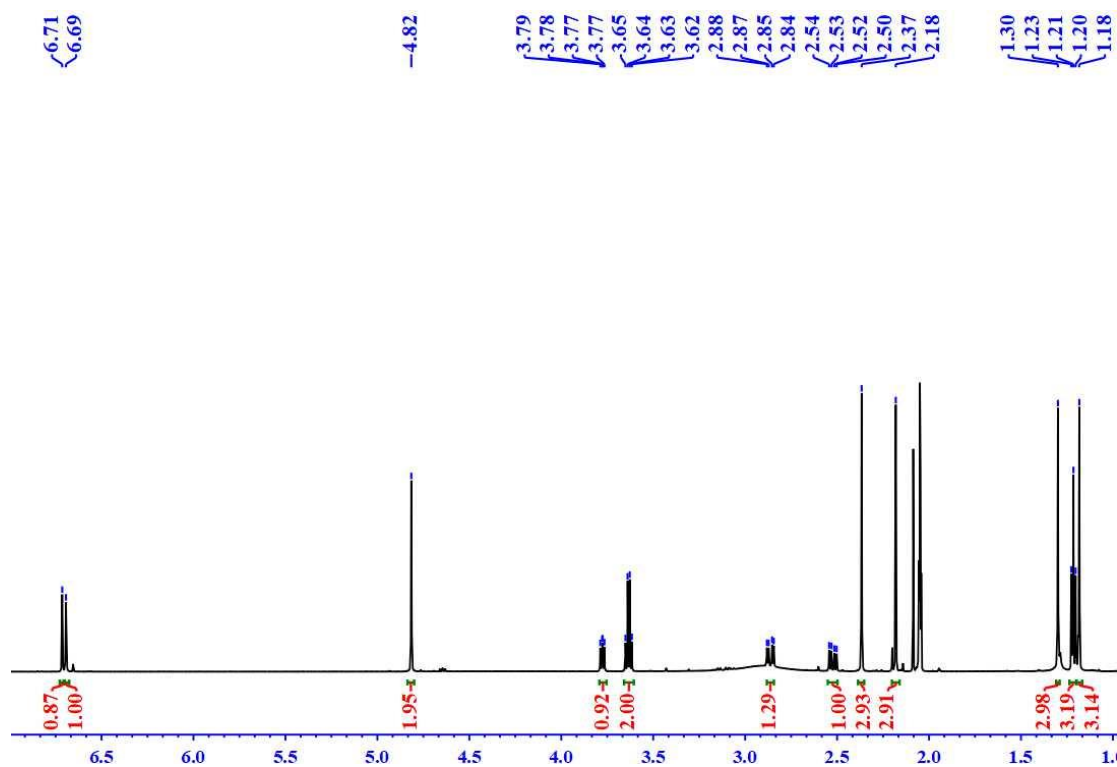

Figure S3.3  $^1\text{H}$  NMR spectrum of mollicellin Q (3) (Acetone- $d_6$ , 600MHz)

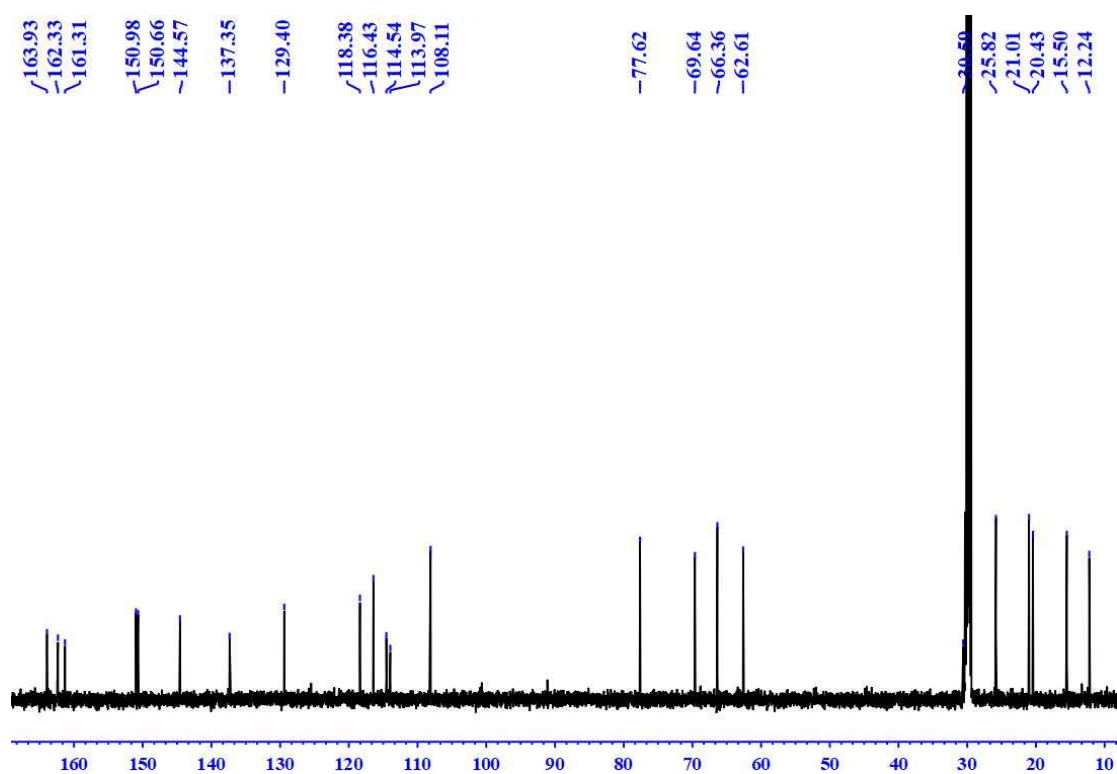

Figure S3.4  $^{13}\text{C}$  NMR spectrum of mollicellin Q (3) (Acetone- $d_6$ , 150 MHz)

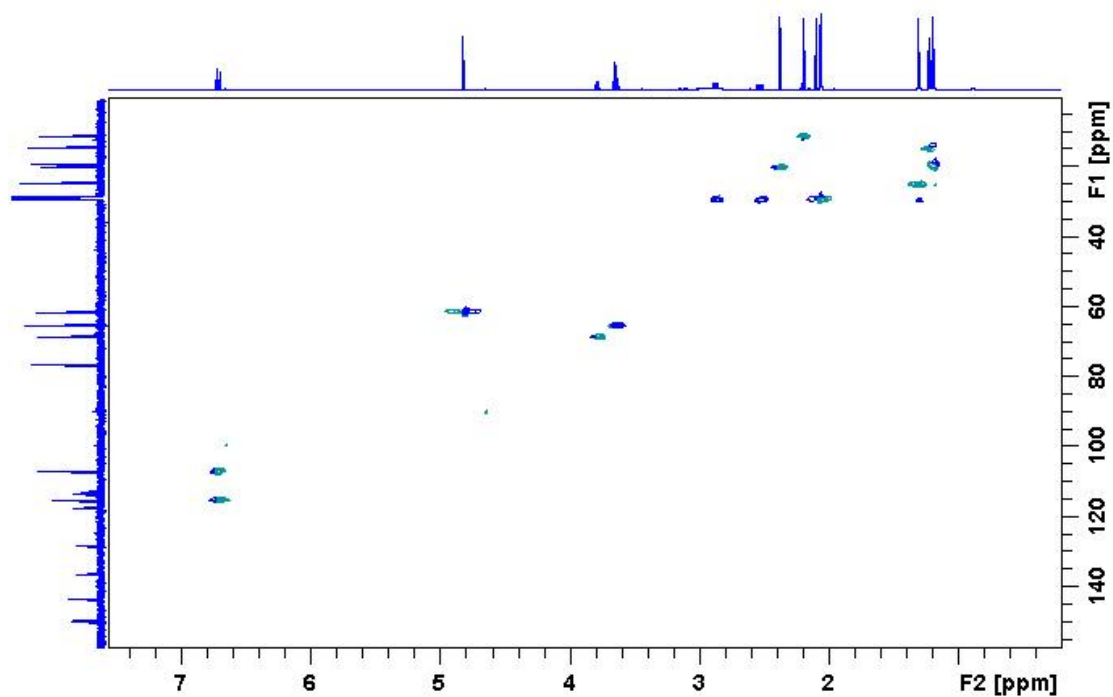

Figure S3.5 HSQC spectrum of mollicellin Q (3) (Acetone- $d_6$ )

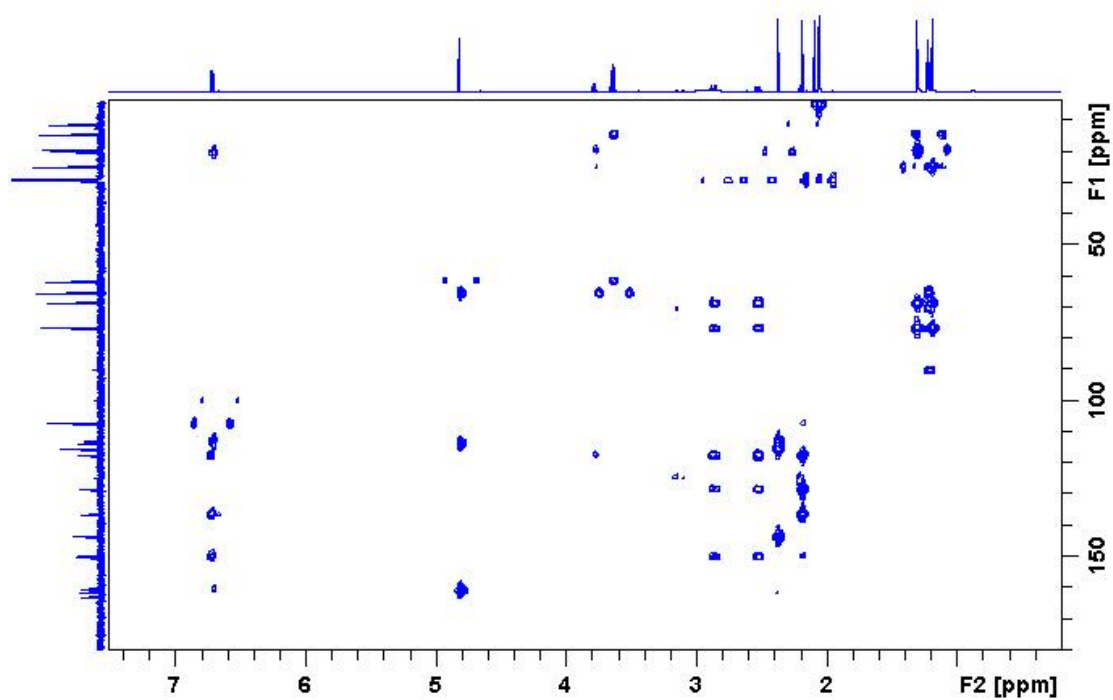

Figure S3.6 HMBC spectrum of mollicellin Q (3) (Acetone- $d_6$ )

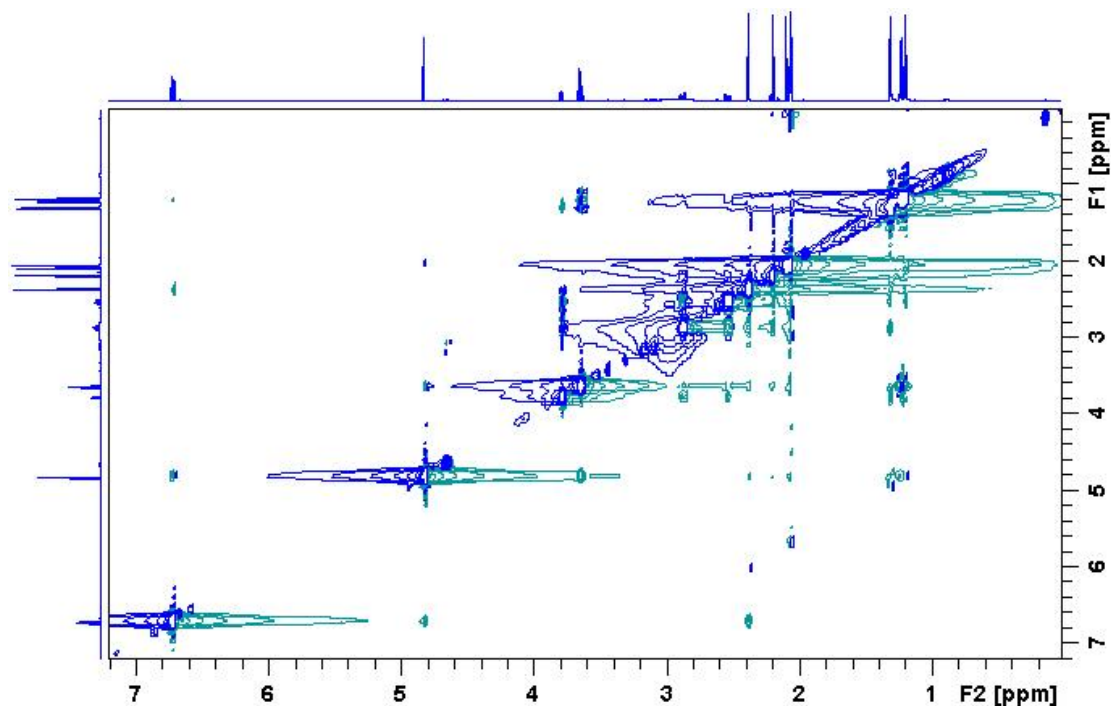

Figure S3.7 NOESY spectrum of mollicellin Q (3) (Acetone- $d_6$ )

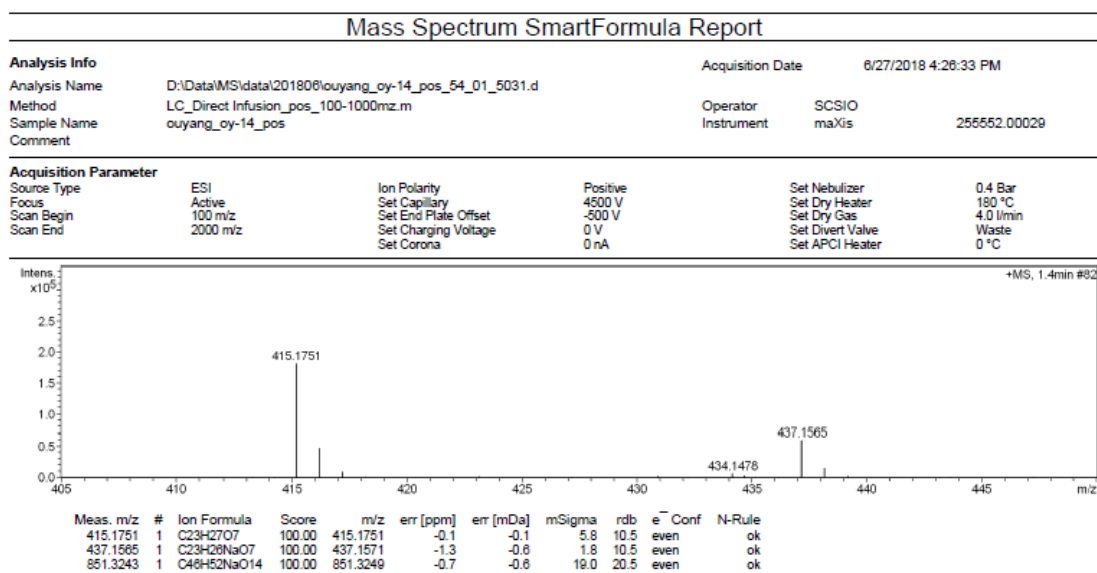

Figure S3.8 HR-ESI-MS spectrum of mollicellin Q (3)



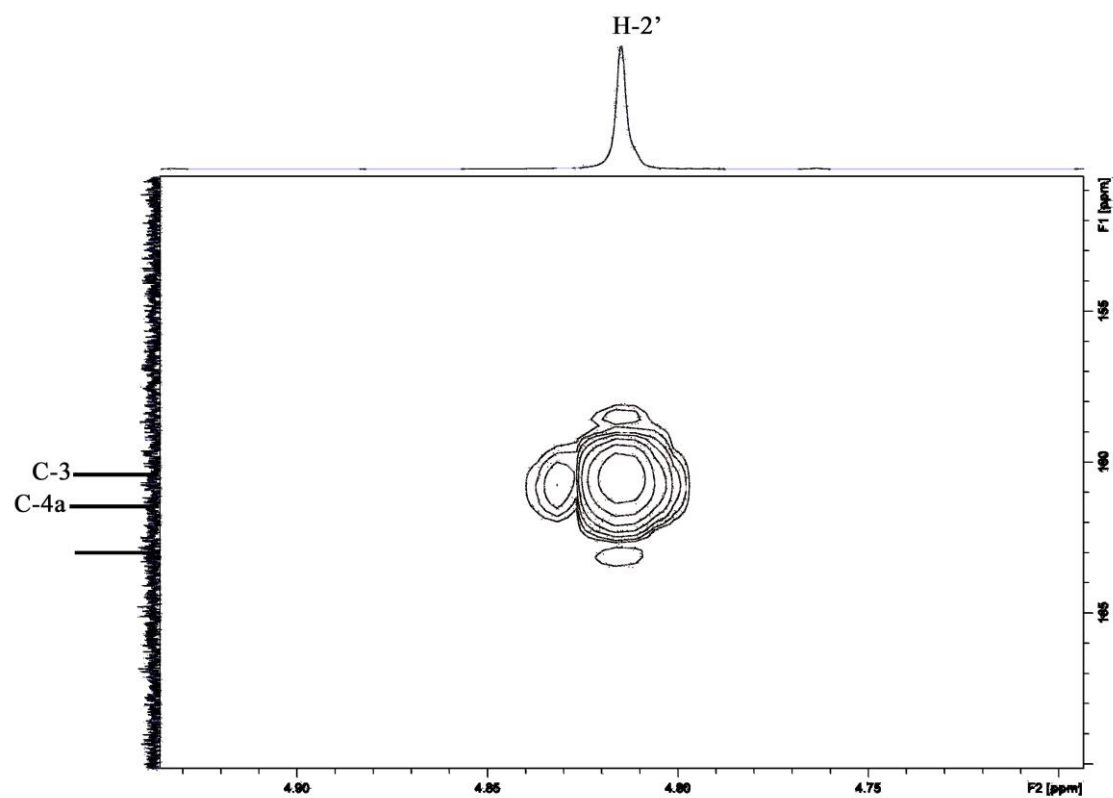

Figure S3.9 HMBC correlation of H-2' with C-4a and C-3 in mollicellin Q (3)

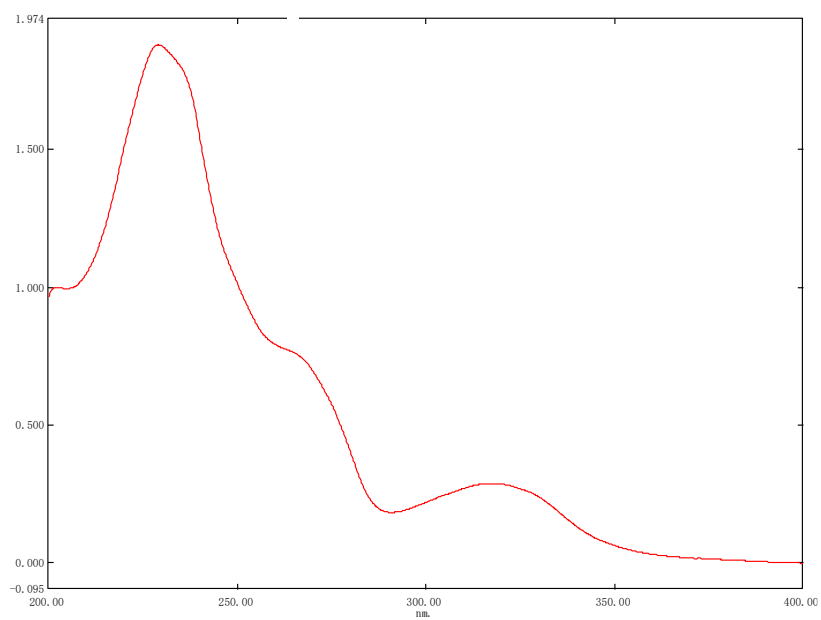

Figure S4.1 UV spectrum of mollicellin R (4)

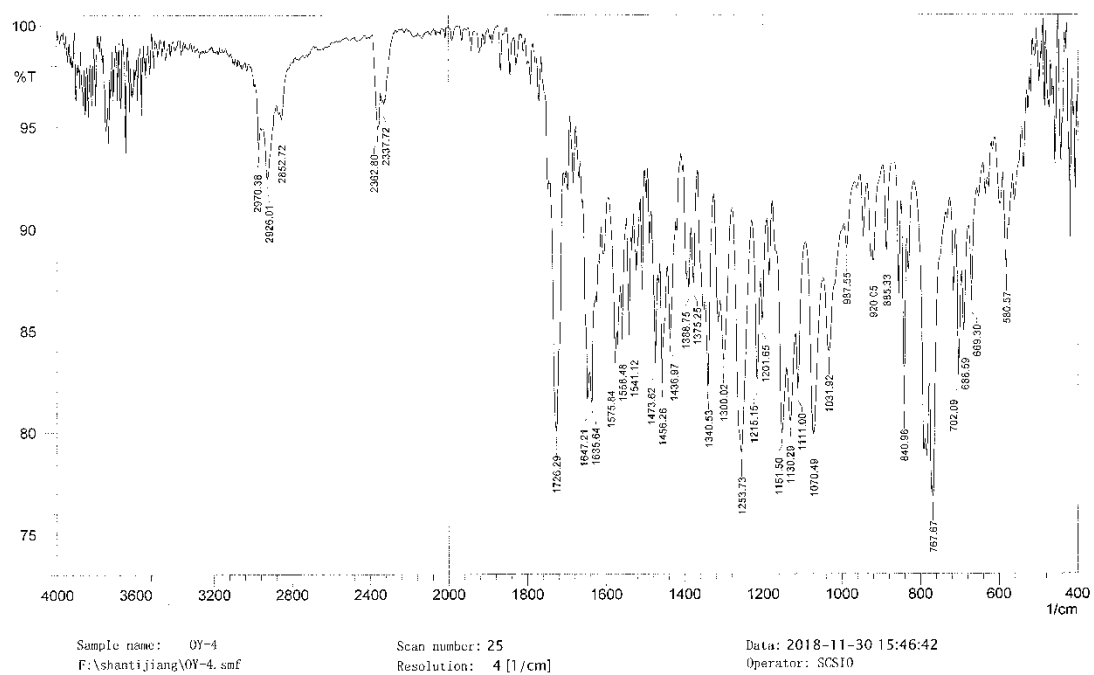

Figure S4.2 IR spectrum of mollicellin R (4)

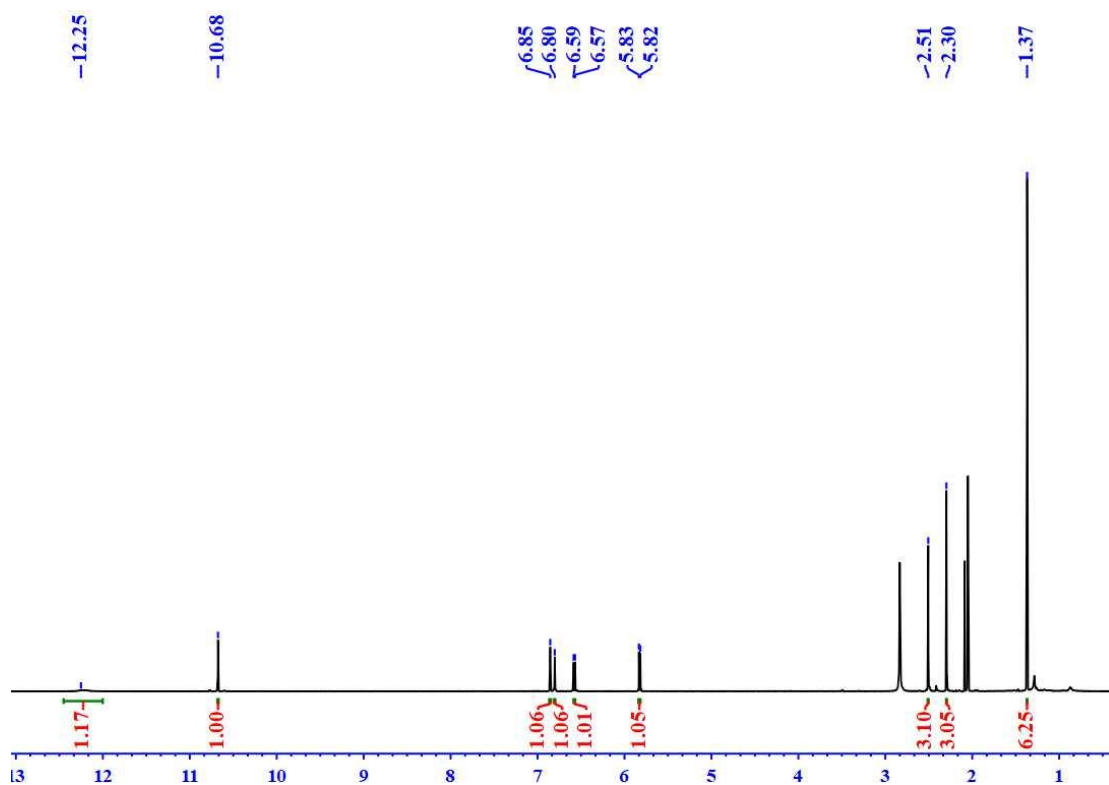Figure S4.3  $^1\text{H}$  NMR spectrum of mollicellin R (4) (Acetone- $d_6$ , 600MHz)

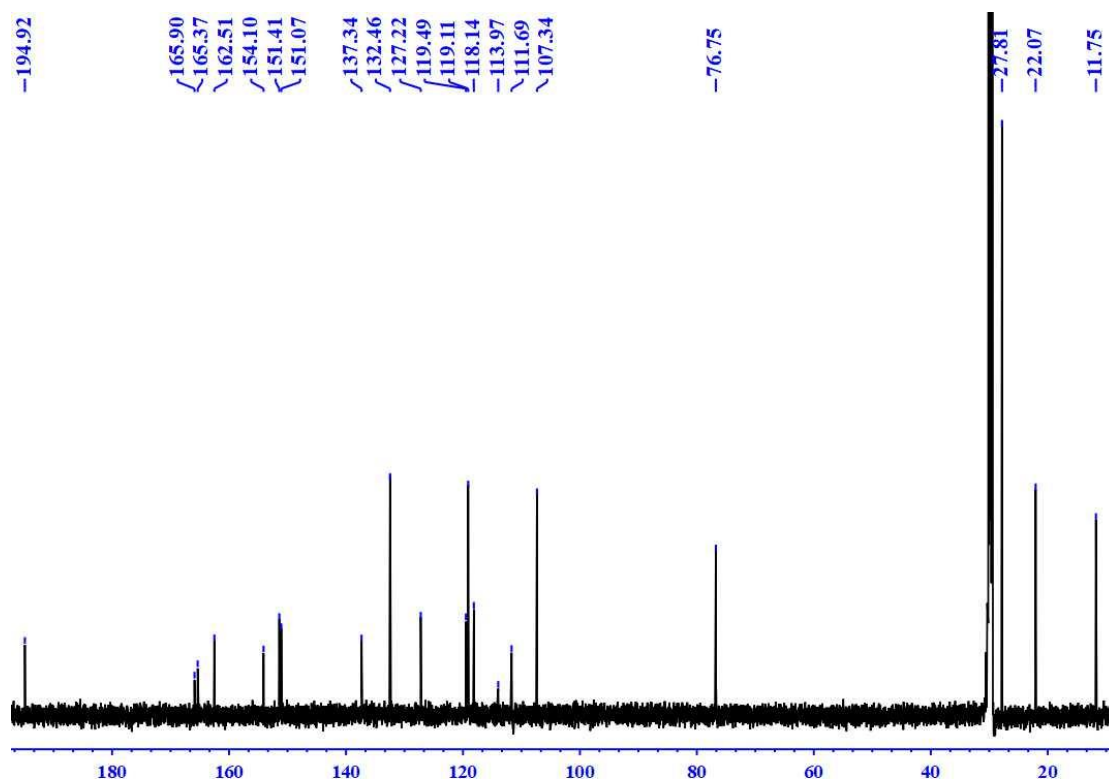

Figure S4.4  $^{13}\text{C}$  NMR spectrum of mollicellin R (4) (Acetone- $d_6$ , 150 MHz)

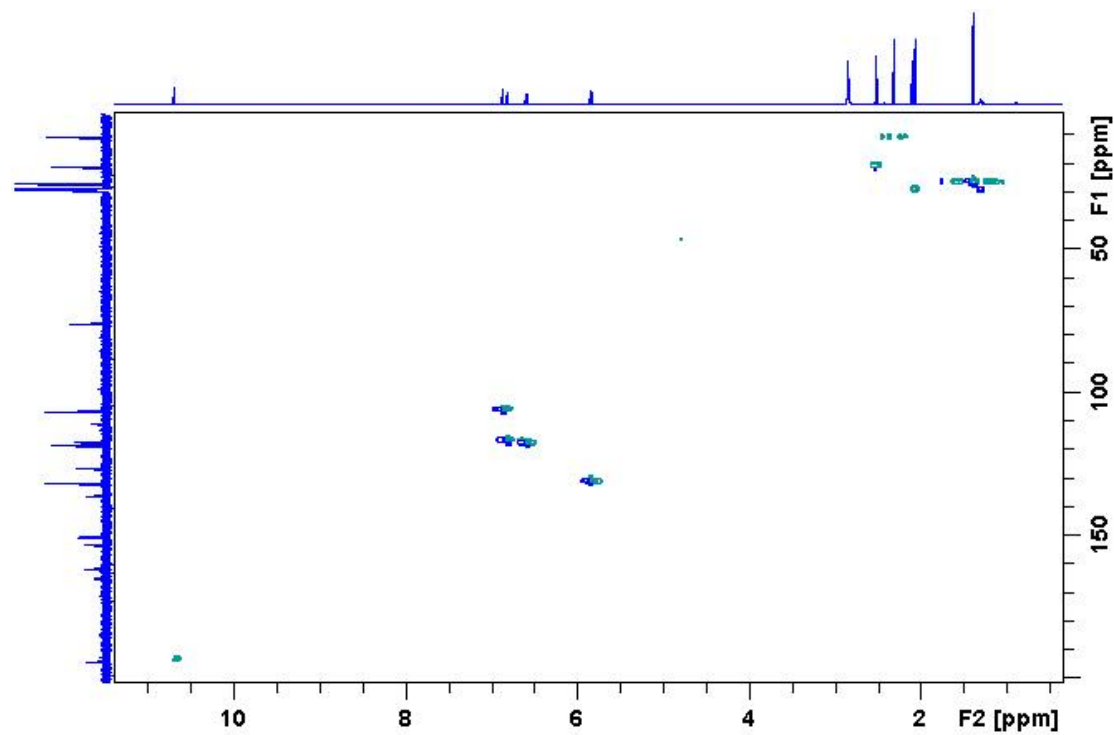

Figure S4.5 HSQC spectrum of mollicellin R (4) (Acetone- $d_6$ )

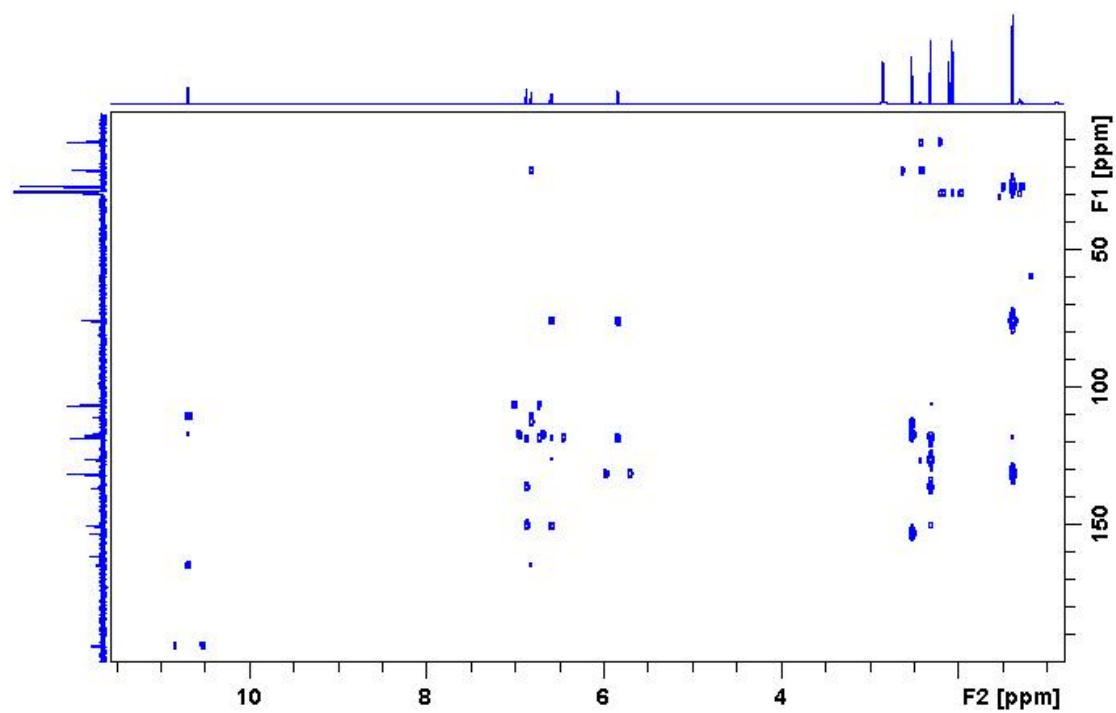

Figure S4.6 HMBC spectrum of mollicellin R (4) (Acetone- $d_6$ )

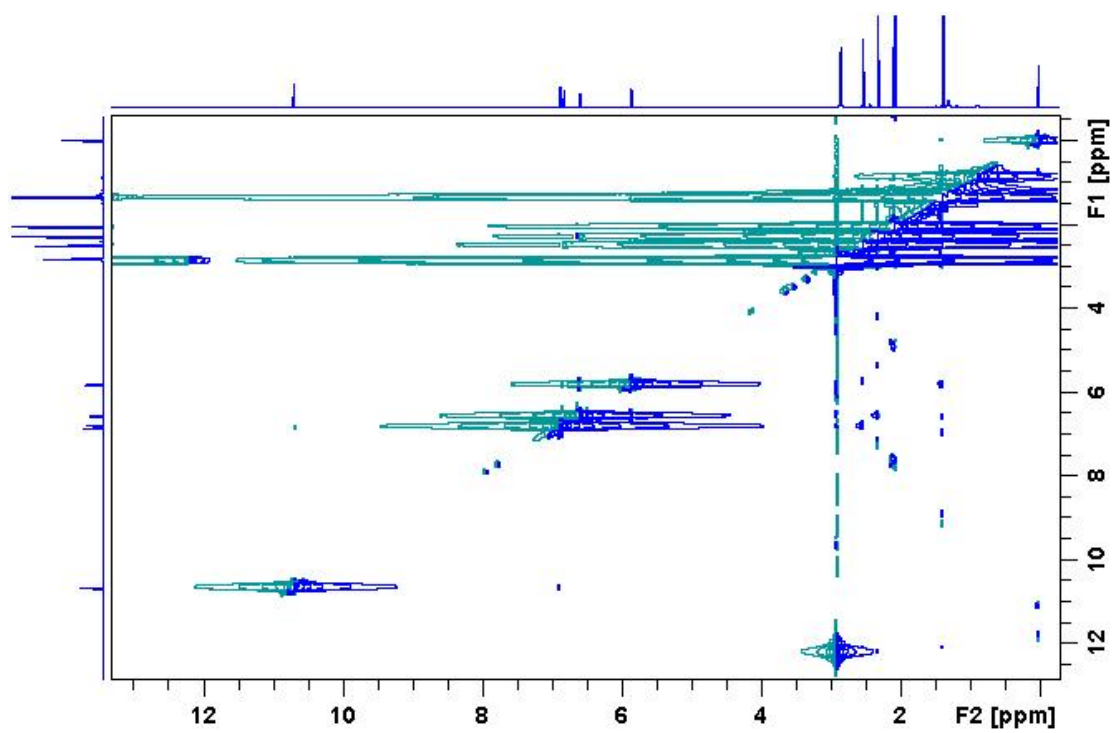

Figure S4.7 NOESY spectrum of mollicellin R (4) (Acetone- $d_6$ )

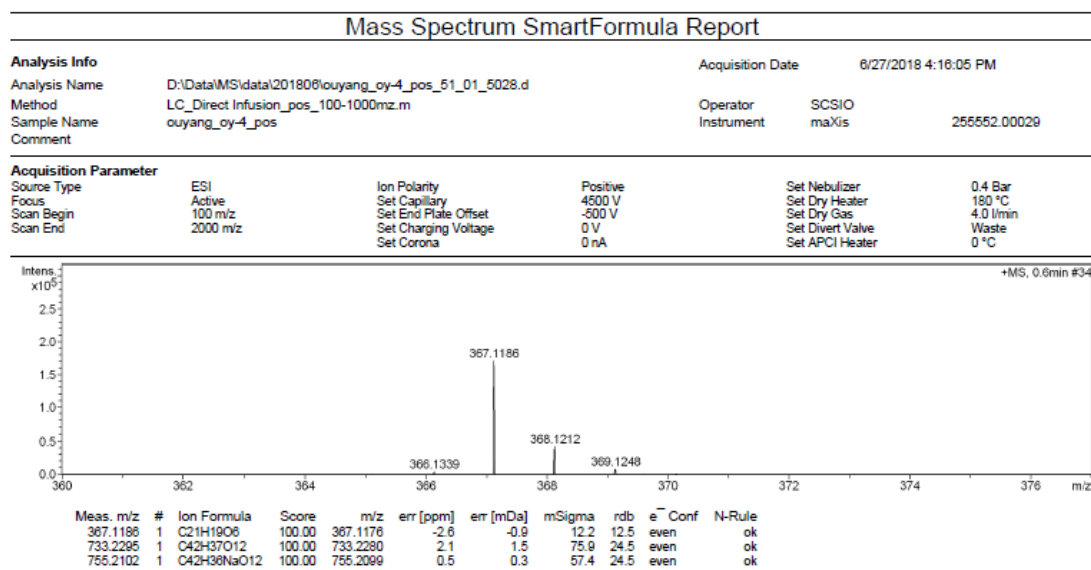

Figure S4.8 HR-ESI-MS spectrum of mollicellin R (4)

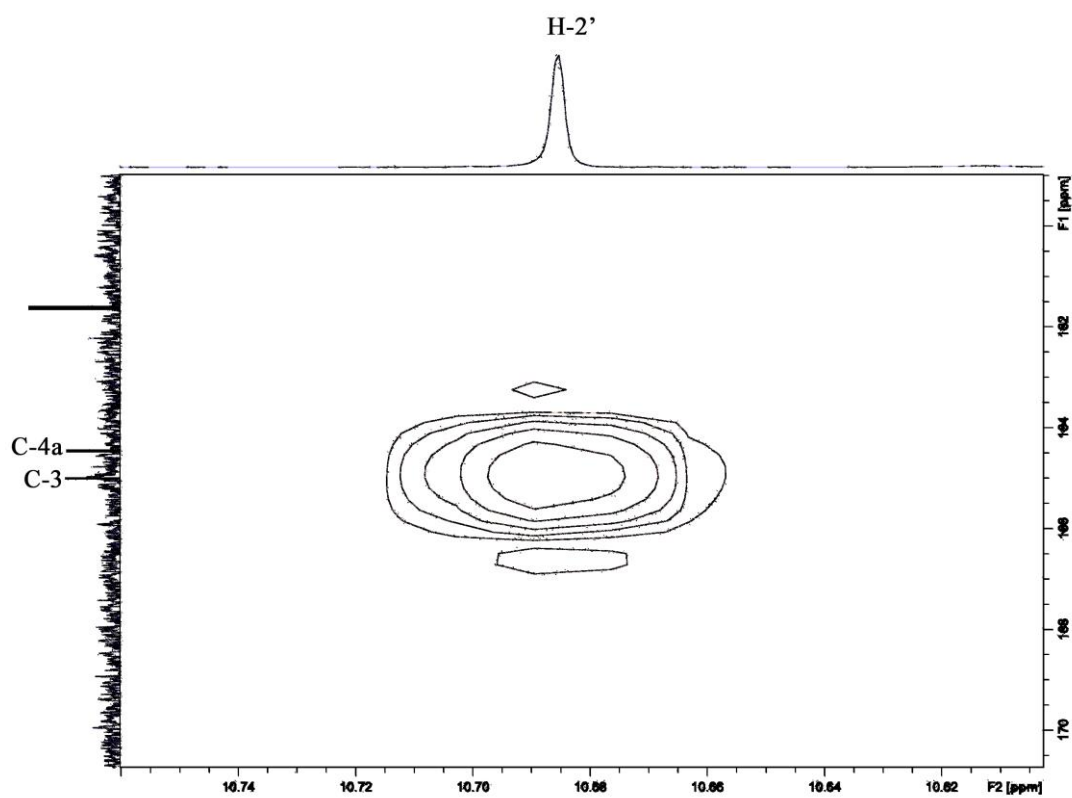

Figure S4.9 HMBC correlation of H-2' with C-4a and C-3 in mollicellin R (4)

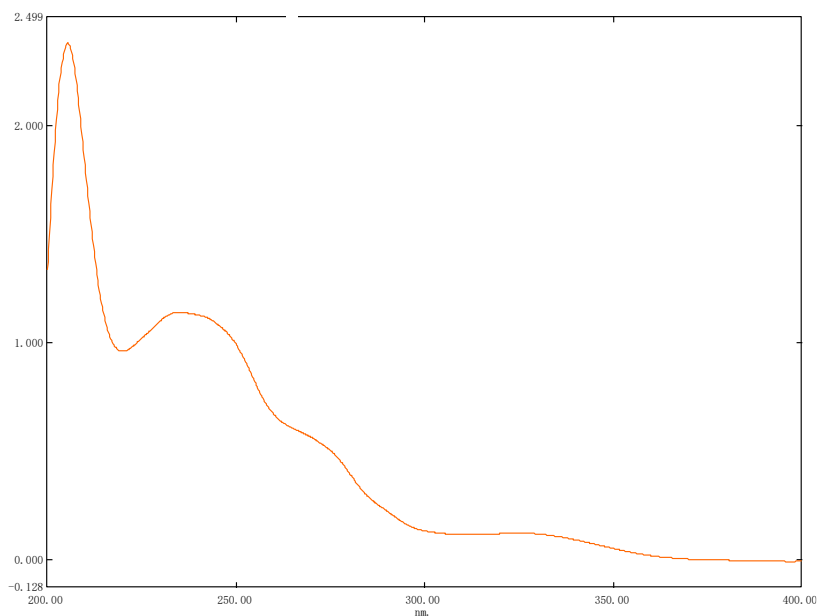

Figure S5.1 UV spectrum of mollicellin G (5)

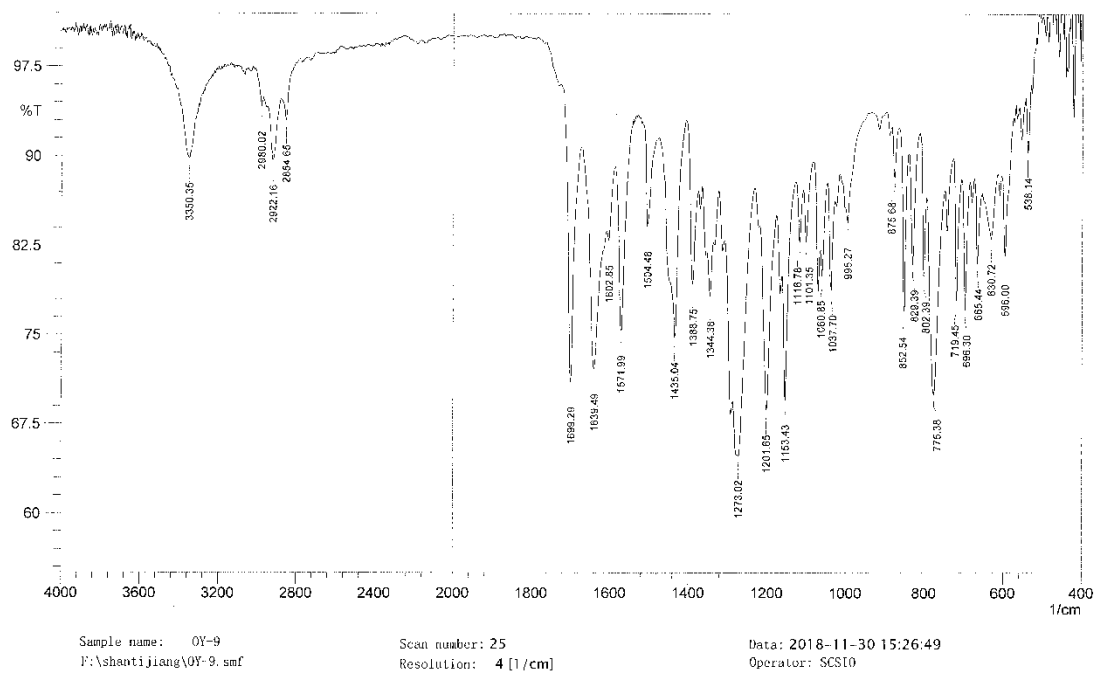

Figure S5.2 IR spectrum of mollicellin G (5)

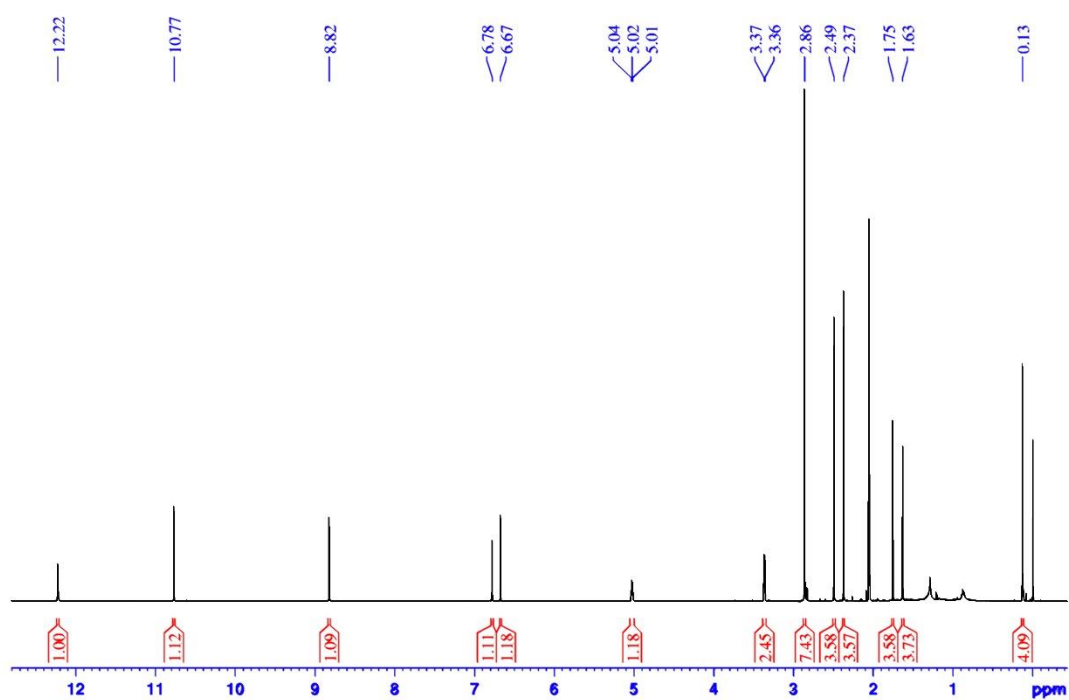

Figure S5.3  $^1\text{H}$  NMR spectrum of mollicellin G (5) (Acetone- $d_6$ , 600MHz)

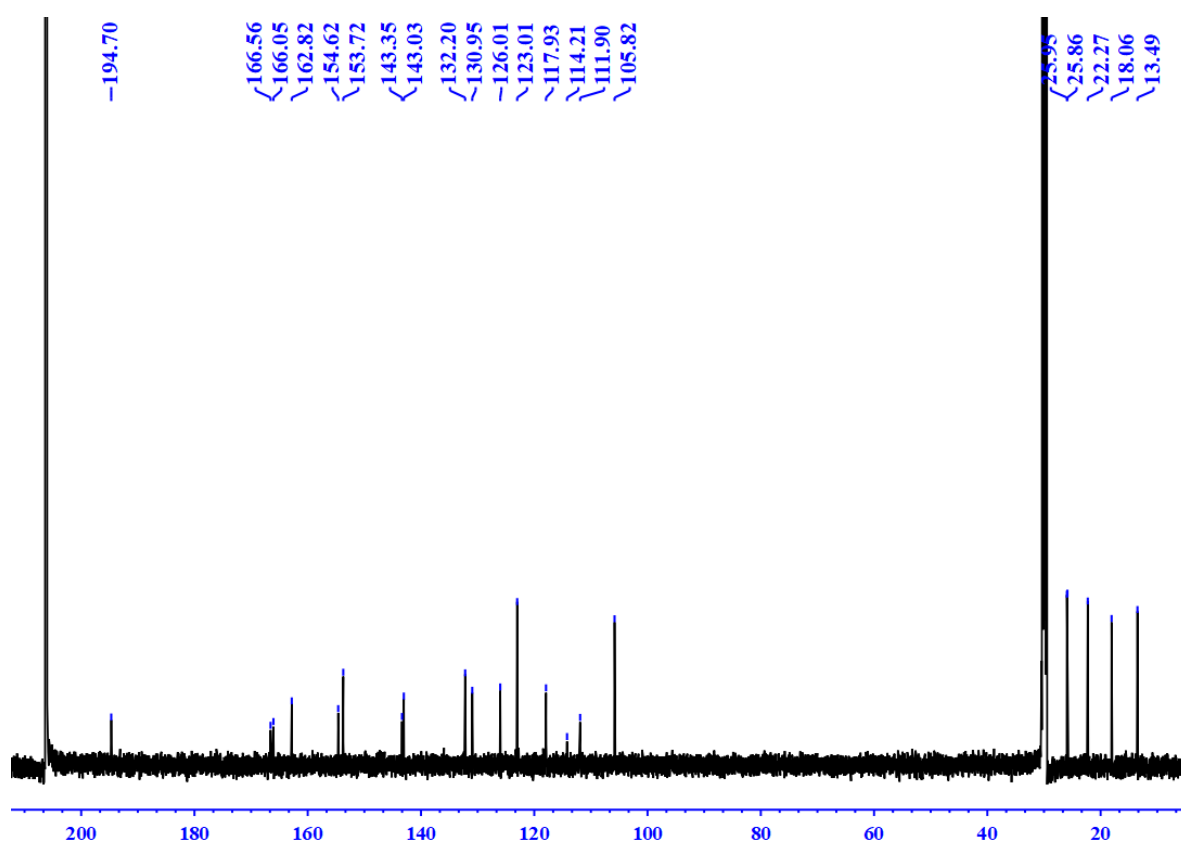

Figure S5.4  $^{13}\text{C}$  NMR spectrum of mollicellin G (5) (Acetone- $d_6$ , 600MHz)

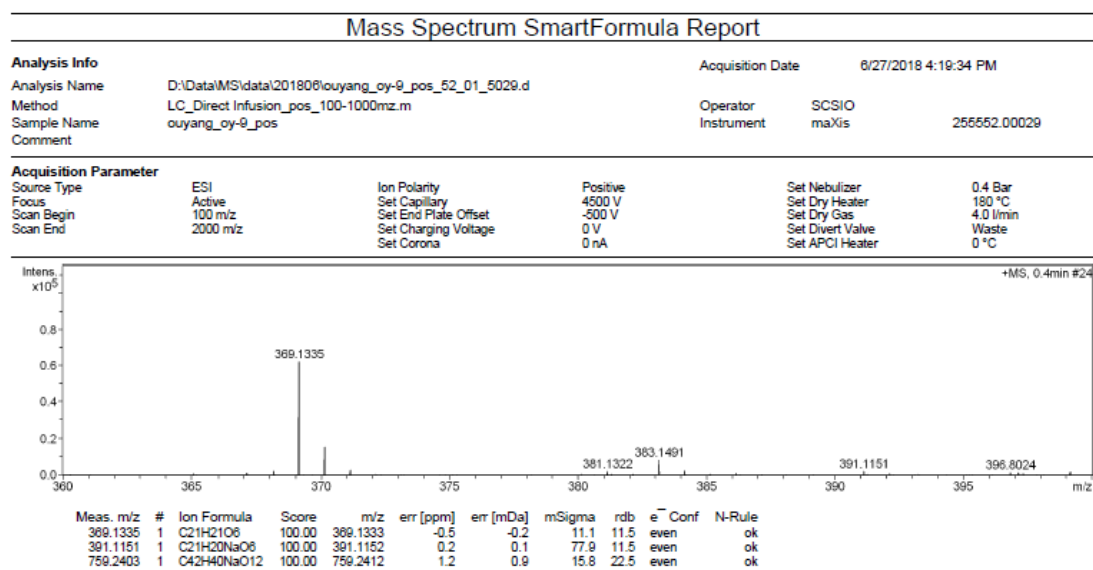

**Figure S5.5** HR-ESI-MS spectrum of mollicellin G (5)

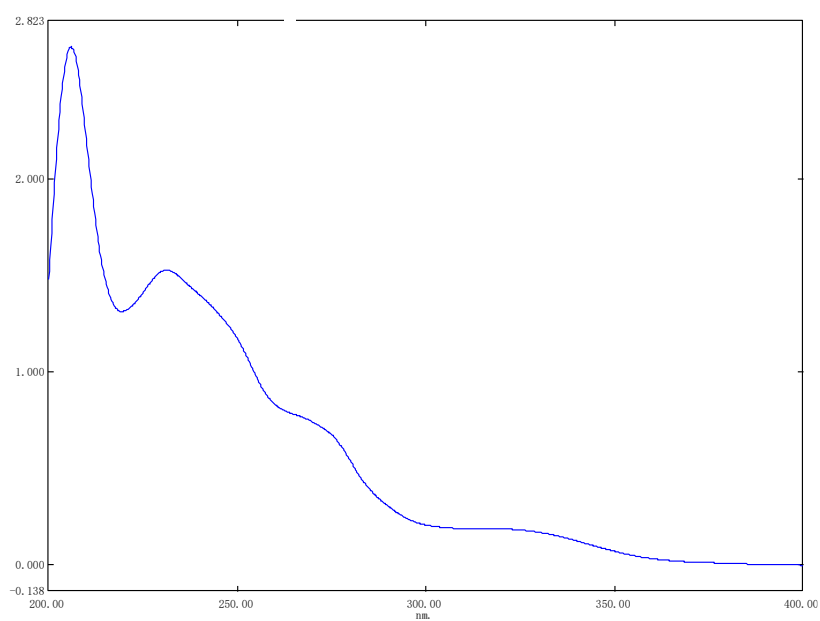

**Figure S6.1** UV spectrum of mollicellin H (6)



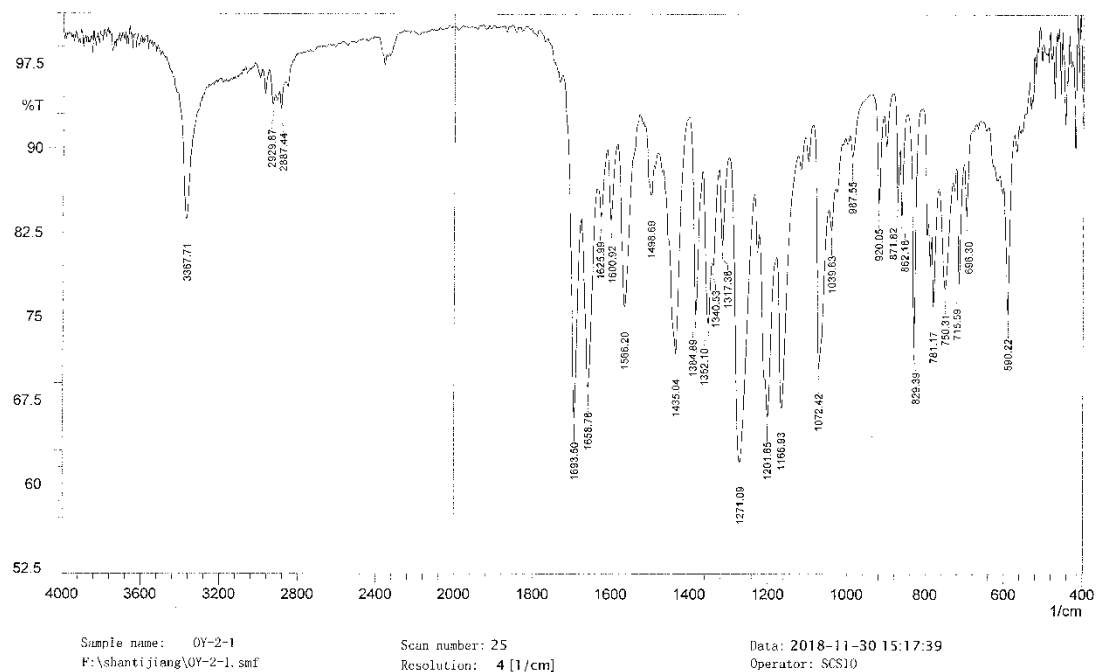

Figure S6.2 IR spectrum of mollicellin H (6)

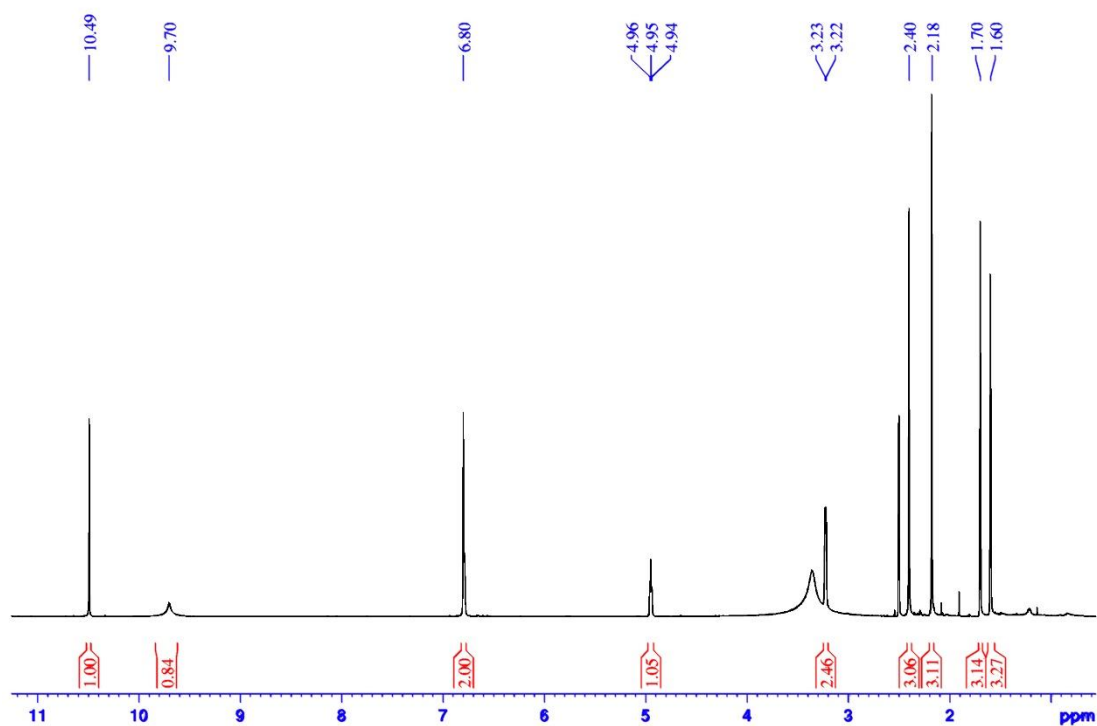Figure S6.3  $^1\text{H}$  NMR spectrum of mollicellin H (6) ( $\text{DMSO-}d_6$ , 600MHz)

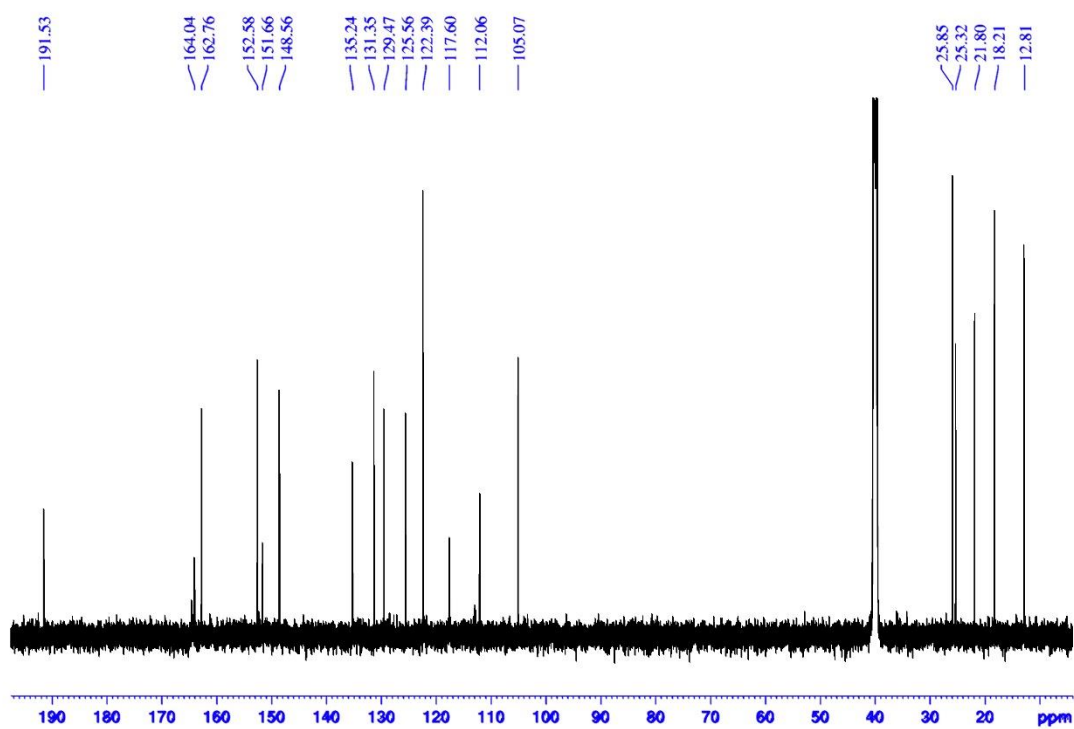

Figure S6.4  $^{13}\text{C}$  NMR spectrum of mollicellin H (6) ( $\text{DMSO-}d_6$ , 150 MHz)

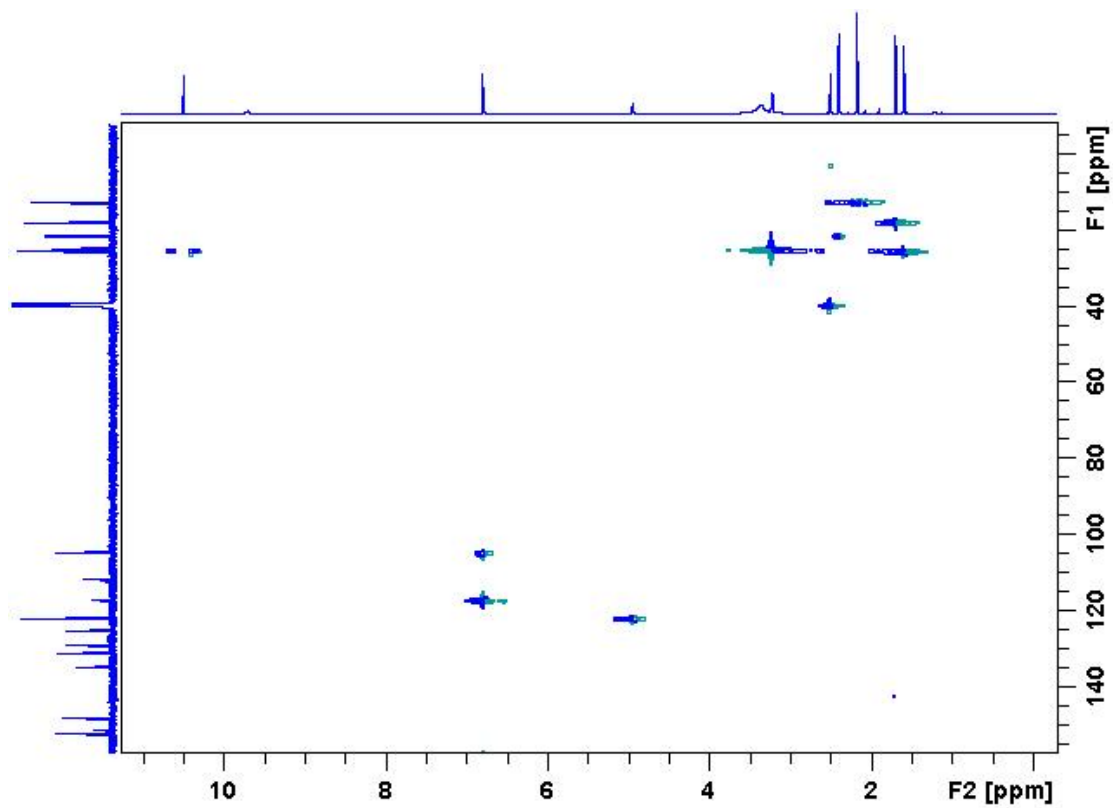

Figure S6.5 HSQC spectrum of mollicellin H (6) ( $\text{DMSO-}d_6$ )

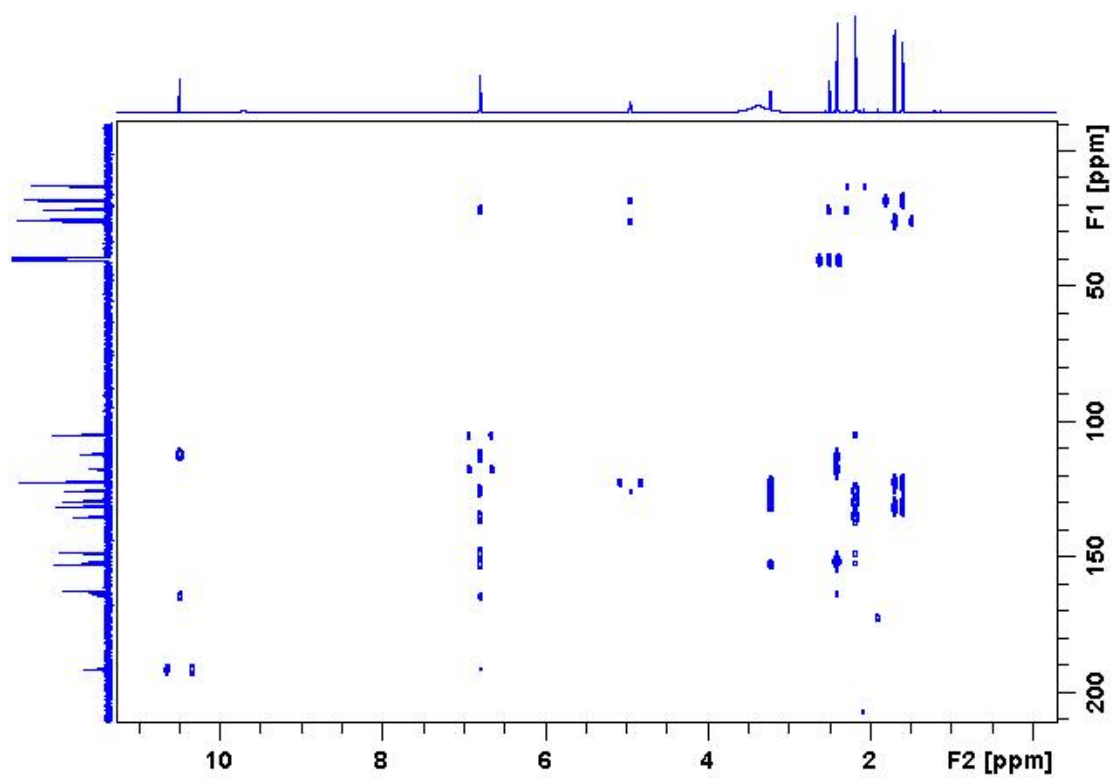

Figure S6.6 HMBC spectrum of mollicellin H (6) (DMSO- $d_6$ )

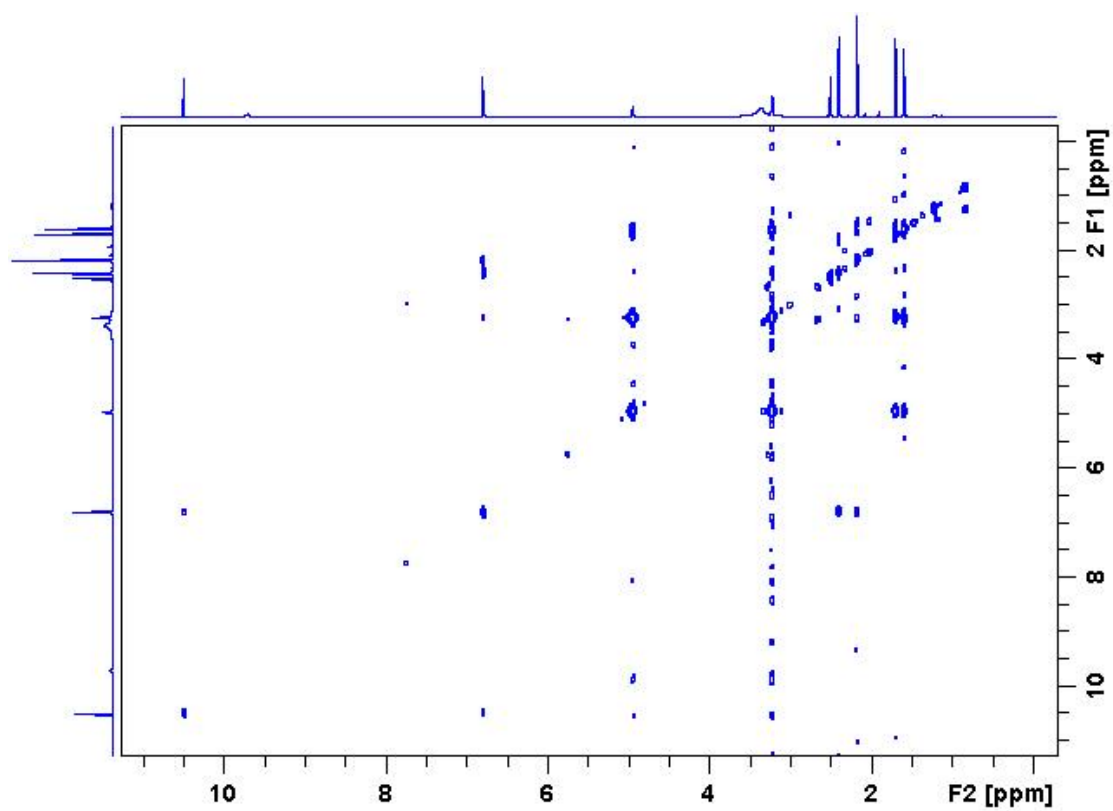

Figure S6.7 NOESY spectrum of mollicellin H (6) (DMSO- $d_6$ )

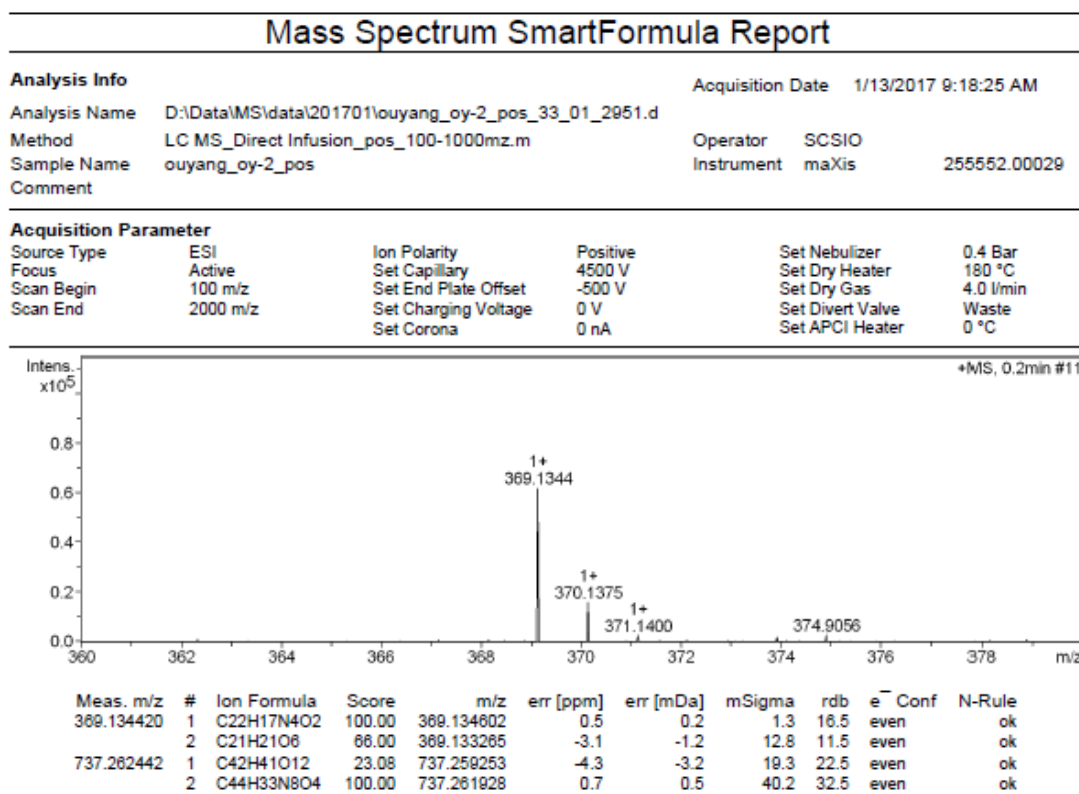

Figure S6.8 HR-ESI-MS spectrum of mollicellin H (6)

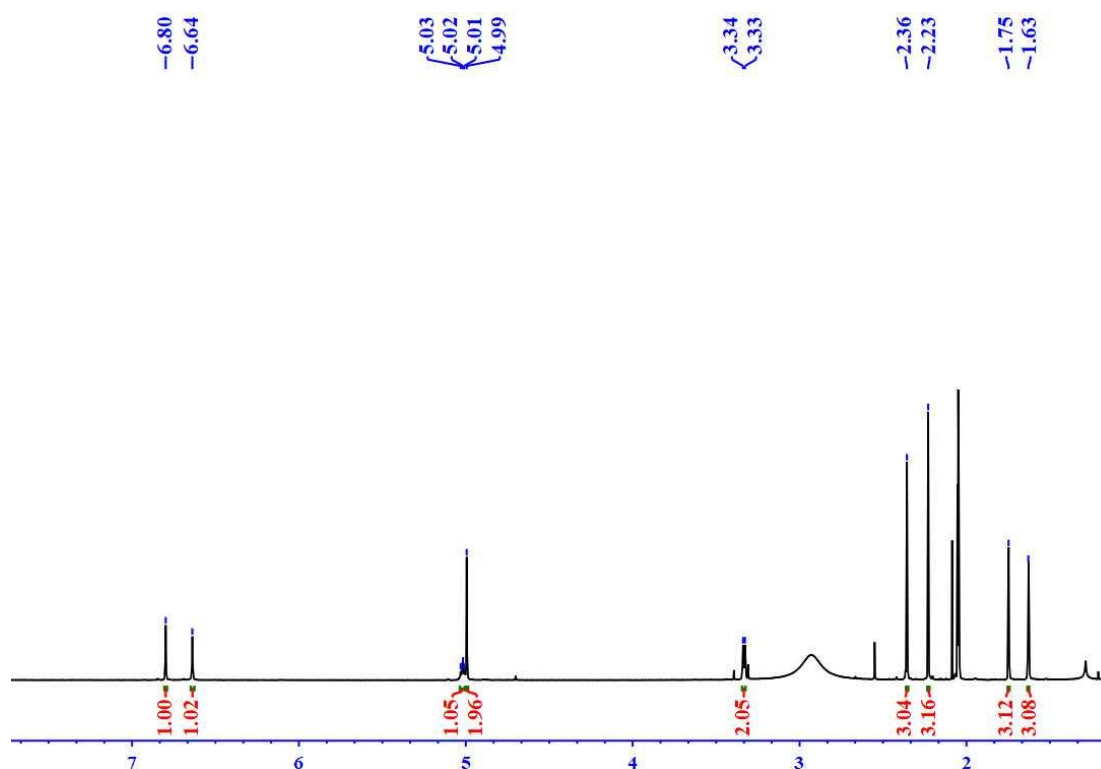Figure S7.1 <sup>1</sup>H NMR spectrum of mollicellin I (7) (Acetone-*d*<sub>6</sub>, 600MHz)

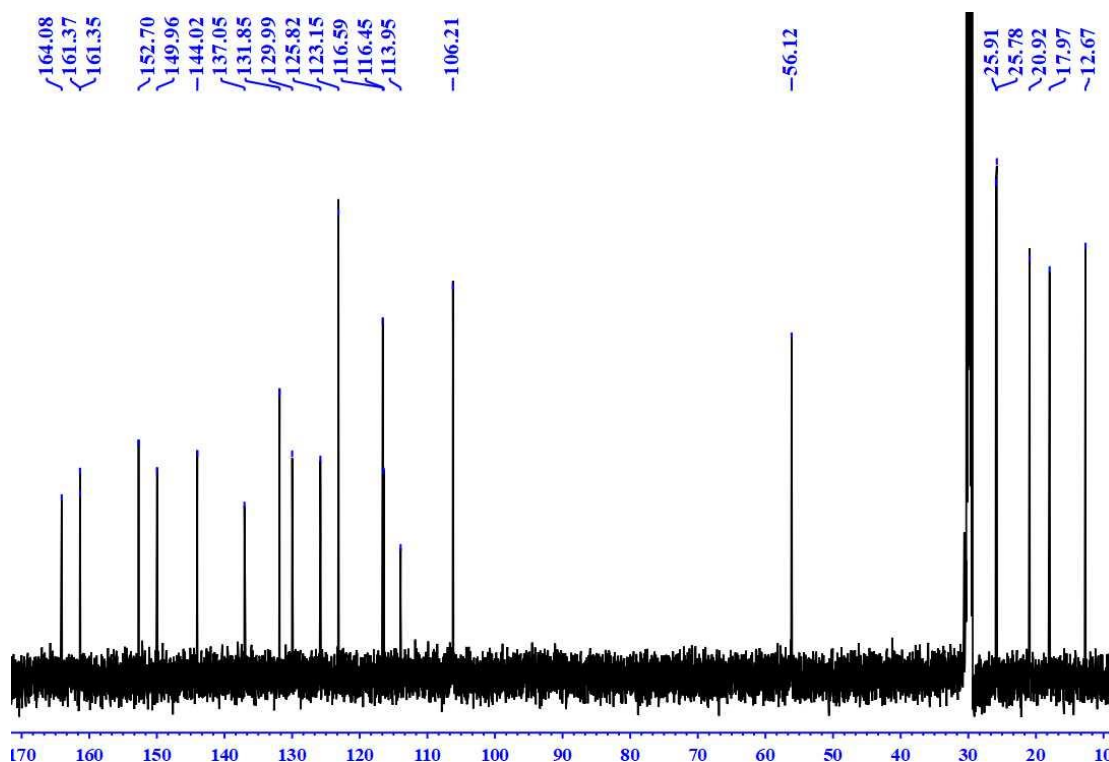

Figure S7.2  $^{13}\text{C}$  NMR spectrum of mollicellin I (7) (Acetone- $d_6$ , 600MHz)

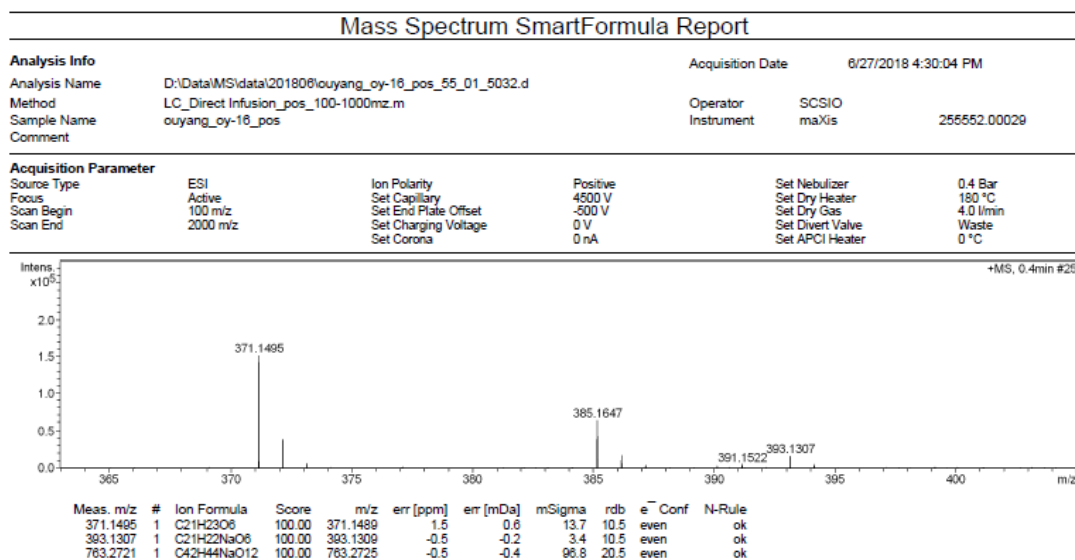

Figure S7.3 HR-ESI-MS spectrum of mollicellin I (7)

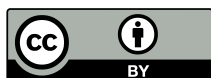

© 2018 by the authors. Submitted for possible open access publication under the terms and conditions of the Creative Commons Attribution (CC BY) license (<http://creativecommons.org/licenses/by/4.0/>).
